## Interventions to improve men's engagement in HIV and other key services in sub-Saharan Africa: a scoping review

Kathryn Dovel<sup>1,2§</sup>, Julie Hubbard<sup>1</sup>, Lycias Zembe<sup>3</sup>, Nathan Ford<sup>4</sup>, Morna Cornell<sup>5</sup>, Will Belshe<sup>1</sup>, Lawrence Long,<sup>6,7</sup> Stephanie Davis,<sup>4</sup> Paula A. Munderi<sup>8</sup>, Rachel Baggaley<sup>4</sup>, Wole Ameyan<sup>4</sup>

<sup>1</sup> University of California, Los Angeles David Geffen School of Medicine

<sup>2</sup> Partners in Hope Medical Center, Lilongwe, Malawi

<sup>3</sup> Joint United Nations Programme on UNAIDS, Switzerland

<sup>4</sup> Department of HIV/AIDS, Viral Hepatitis and STIs, World Health Organization, Geneva, Switzerland

<sup>5</sup> Centre for Infectious Disease Epidemiology & Research, School of Public Health, University of Cape Town, Cape Town, South Africa

<sup>6</sup> Health Economics and Epidemiology Research Office (HE<sup>2</sup>RO), Faculty of Health Sciences, University of Witwatersrand, Johannesburg, South Africa

<sup>7</sup> Department of Global Health, Boston University School of Public Health, Boston, United States

<sup>8</sup> Programme Innovation for Prevention Treatment & Pediatrics | UNAIDS

<sup>§</sup> Corresponding Author: Kathryn Dovel

Division of Infectious Diseases, David Geffen School of Medicine

10833 Le Conte Ave, Los Angeles, CA 90095

Phone: +13108838179

Email: [kdovel@mednet.ucla.edu](mailto:kdovel@mednet.ucla.edu) / [kldovel@gmail.com](mailto:kldovel@gmail.com)

### ABSTRACT

#### Background

Men in sub-Saharan Africa (SSA) continue to have worse health outcomes across HIV, STI, and TB-HIV co-infections as compared to women. Improving service coverage is critical for population health and HIV epidemic control. In HIV, for example, recent models show that improving men's HIV testing and treatment coverage could reduce HIV incidence among women in the region by half. There is potential to combine and optimize services across HIV, STI and TB-HIV co-infections, yet little is known about effective interventions to improve men's outcomes across health services.

#### Methods

We conducted a scoping review of interventions to understand what interventions work for men, and any synergies in interventions that work across health services. We specifically focused on interventions aimed to improve service utilization in the following service domains: condom use; pre-exposure prophylaxis (PrEP); STI testing and treatment; HIV testing, initiation, and retention; and TB testing and treatment among those living with HIV (co-infected). Articles and abstracts had to include sex-disaggregated data or solely focus on men's health service outcomes. We searched PubMed, Medline, Cochrane Central Register of Controlled Trials, the CABI Global Health databases, and major international conference abstracts. We included studies from SSA, published between January 1, 2009 to Dec 31, 2022, quantitative data on at least one of the selected service domains, disaggregated data for the general male population (not solely key populations), an intervention study (report outcomes for

at least one non-standard service delivery strategy) with a comparison group, and available in English. We describe the type of interventions evaluated and synthesize overarching themes of “what works” for reaching men.

### **Findings**

We identified 15,595 intervention articles and included 71 in the scoping review, representing 111 unique interventions. Over a quarter of interventions targeted male partners and only 7 exclusively targeted men. Nearly half of the interventions had HIV testing as their primary outcome. Only a handful of interventions included outcomes related to condom use, STI, or TB co-infection services. No interventions examined the effect of PrEP use among general male populations. Community services was the most common intervention type (n=40, 36%), followed by community outreach (n=19; 17%), incentives (n=16; 14%) and facility services (n=16, 14%). Counseling and peer support had the least number of interventions evaluated (n=8, 7%). We were unable to identify cross-cutting strategies to reach men across HIV and related health services in sub-Saharan Africa, largely because there is little evidence outside HIV testing interventions. The limited evidence available points to the fact that men need convenient, active outreach, and improved experiences with health services. The same principles may apply to all services intended to reach men, including sexual health and TB co-infection services, although the evidence is limited.

### **Conclusion**

This review highlights the need for additional research on cross-cutting strategies to improve men’s engagement in HIV and related health services. The limited evidence available suggests that convenient services, actively engaging men, and providing positive experiences with health services largely improve service utilization. Additional evidence is needed for PrEP use and non-HIV services (such as STI and TB co-infection).

## Introduction

Men in sub-Saharan Africa (SSA) experience higher rates of morbidity and mortality from HIV, TB, and higher rates of many sexually transmitted infections (STIs).<sup>1-6</sup> as compared to women. Among those infected with HIV, men are twice as likely as women to have advanced HIV disease<sup>7</sup> and twice as likely to die from TB.<sup>8,9</sup> Untreated STIs among men are a major contributor to HIV acquisition.<sup>10</sup> Addressing disparities in HIV and related services is critical for population health and HIV epidemic control. Recent models show that improving men's HIV testing and treatment coverage could reduce HIV incidence among women in the region by half.<sup>11</sup>

An important next step is to identify and implement evidence-based strategies to improve men's use of health services across the HIV cascade and related health services, such as STI and TB-HIV co-infection. There is extensive synthesis of what works for men's use of HIV testing services<sup>12-16</sup> and growing evidence around linkage<sup>17-19</sup> and retention<sup>20</sup> to HIV treatment services. There is some evidence about strategies that work to reduce sexual risk behavior among adolescent and young men.<sup>21</sup> However to our knowledge there is little synthesized evidence around what works for HIV-related services such as TB co-infection and STI services, and little to no synthesis of what works across the HIV cascade and related health services.

Identifying cross-cutting strategies that work for men across the HIV cascade and related health services is important. It can promote scalability and sustainability, moving away from siloed interventions and moving toward holistic health systems approaches. Fragmented health systems reduce the ability of health services to respond to the needs of vulnerable clients.<sup>22</sup> Sustainable development goals acknowledge that improving health means improving multiple components of health and health outcomes. Further, men's experiences with health services are not siloed. Positive or negative experiences with any health service can impact men's decision to use HIV services in the future.<sup>23-25</sup> Improved experiences with general health services (not just HIV services) may improve men's engagement with health systems more broadly, and HIV services specifically.

We conducted a scoping review of literature from 2009 to 2022 to examine the impact of interventions on men's use of HIV and other key services (i.e., condom use and PrEP services; STI testing and treatment; HIV testing, initiation, and retention; and TB-HIV co-infection testing and treatment) in sub-Saharan Africa. We identify potential synergies and optimized delivery strategies across HIV and other key services and identify key research gaps to facilitate cross-cutting interventions for men.

## Methods

We used the extended framework by Levac and colleagues<sup>26,27</sup> in accordance with the Preferred Reporting Items for Systematic Reviews and Meta-analysis extension for scoping reviews (PRISMA-ScR) checklist.<sup>28</sup> This review is drawn from larger work to identify interventions that facilitate the use of HIV and related services among men in sub-Saharan Africa conducted to support the development of the World Health Organization's 2023 Men and HIV Framework. Here we describe findings from the scoping review focused on HIV and related services. We focus on articles that report intervention impact on men's use of one or more HIV or related services in SSA. We exclude articles on voluntary medical male

circumcision (VMMC) because, unlike other services, VMMC is only needed once across the life course and barriers/facilitators to service utilization are very different than other services.

### ***Search strategy and data selection***

We included studies of interventions that included some comparison data. Most studies were randomized control trials, quasi-experimental studies, observational cohort studies, and program evaluations. All articles described interventions to improve the use of the following services in SSA: condom use; pre-exposure prophylaxis (PrEP); STI testing and treatment; HIV testing, initiation, and retention; and TB testing and treatment among those living with HIV (co-infected). All articles included at least one intervention (i.e., non-standard service delivery strategy) with a comparison group – comparisons were not required to be standard of care. We excluded articles that exclusively targeted key populations as these populations may need different interventions than the general male population. Articles may include both male and female participants but were only included if they reported sex-disaggregated results. Finally, we only included articles where participants were from SSA (using the United Nations sub-regions of Africa) and articles were available in English. We retrieved articles published between January 1, 2009 to Dec 31, 2022.

To identify articles, we searched the PubMed database and then adapted our search strategy for Medline, Cochrane Central Register of Controlled Trials, the CABI Global Health databases, and major international conference abstracts. We searched using Medical Subject Headings (MeSH), keywords, and filters as appropriate (see Table 1 for keywords). We completed two searches: We first searched for sources published from January 1, 2009, to the date of the literature pull (May 9, 2021). We then completed a revised search from the date of the last literature pull (May 9, 2021) until Dec 31, 2022.

---

**Table 1.** Key search words used

| Concept                | Text Key Words                                                                                                                                                                                                                                                                                                                                                                                                                                                                                                                                                                                          |
|------------------------|---------------------------------------------------------------------------------------------------------------------------------------------------------------------------------------------------------------------------------------------------------------------------------------------------------------------------------------------------------------------------------------------------------------------------------------------------------------------------------------------------------------------------------------------------------------------------------------------------------|
| ART                    | ART; Antiretroviral; Retroviral; HAART                                                                                                                                                                                                                                                                                                                                                                                                                                                                                                                                                                  |
| HIV                    | HIV; human immunodeficiency virus                                                                                                                                                                                                                                                                                                                                                                                                                                                                                                                                                                       |
| Condom use             | Safe* sex; Condom; Pre-exposure prophylaxis; Sexual partner*                                                                                                                                                                                                                                                                                                                                                                                                                                                                                                                                            |
| PrEP                   | Pre-exposure prophylaxis; PrEP                                                                                                                                                                                                                                                                                                                                                                                                                                                                                                                                                                          |
| STI                    | Sexually transmitted infection* (Bacterial Vaginosis, Chlamydia, Gonorrhea, Hepatitis, Herpes, Mycoplasma genitalium, Syphilis, Trichomoniasis)                                                                                                                                                                                                                                                                                                                                                                                                                                                         |
| TB-HIV co-infection    | Tuberculosis AND HIV; co-infection                                                                                                                                                                                                                                                                                                                                                                                                                                                                                                                                                                      |
| Initiation             | Initiat*; Uptake; Link*; Early Care                                                                                                                                                                                                                                                                                                                                                                                                                                                                                                                                                                     |
| Retention              | Retention; Retain*; Viral suppression; Sustained Virological Response"; advanced HIV; Acquired immunodeficiency syndrome                                                                                                                                                                                                                                                                                                                                                                                                                                                                                |
| Sub-Saharan Africa     | *Saharan Africa ( Angola, Benin, Botswana, Burkina Faso, Burundi, Cabo Verde, Cameroon, Central African Republic, Chad, Comoros, Congo, Democratic Republic of, Congo, Republic of Cote d'Ivoire, Equatorial Guinea, Eritrea, Eswatini (Formerly Known as Swaziland), Ethiopia, Gabon, Gambia, The, Ghana, Guinea, Guinea-Bissau, Kenya, Lesotho, Liberia, Madagascar, Malawi, Mali, Mauritania, Mauritius, Mozambique, Namibia, Niger, Nigeria, Rwanda, Sao Tome and Principe, Senegal, Seychelles, Sierra Leone, Somalia, South Africa, South Sudan, Sudan, Tanzania, Togo, Uganda, Zambia, Zimbabwe) |
| Intervention           | Intervention*; Trial; Random*; Program*; Project; Strateg*                                                                                                                                                                                                                                                                                                                                                                                                                                                                                                                                              |
| Publication year limit | 2009:2021.(sa_year); 2021; 2022 (sa_year)                                                                                                                                                                                                                                                                                                                                                                                                                                                                                                                                                               |

### ***Selection of sources of evidence***

We first removed duplicates. One author then conducted a title and abstract review and removed sources that did not meet the study inclusion and exclusion criteria. We entered results from the search strategy into an Endnote<sup>29</sup> database and two reviewers reviewed the full text of the remaining sources to determine final study eligibility, with any conflicts resolved by KD.

### ***Data charting process***

We developed a data-charting form (Excel spreadsheet) based on the study objectives. Information included: study and participant characteristics (e.g., country, year of data collection, eligibility criteria), details of intervention and comparison models (e.g. location, frequency, and services provided), health service or clinical outcomes captured, and any concerns regarding quality (including potential bias in

data collection, reporting, or analysis). Data were entered directly into the structured data-charting form independently by four reviewers. After all data were entered into the data-charting form, lead authors reviewed and refined the form iteratively. Any inconsistencies were reconciled and KD performed spot-checks.

### **Synthesis**

We categorized interventions into five intervention types, which were informed by Duncombe's key components of tailored care across the treatment cascade<sup>30</sup>: facility-based services, community-based services, community outreach, counseling and/or peer support, mHealth, and incentives (see Table 2 for definitions). We summarized interventions, key components, and key limitations across service domains.

**Table 2.** Intervention type and definitions

| <b>Intervention Type</b> | <b>Definition</b>                                                                                                                                                                                                                       |
|--------------------------|-----------------------------------------------------------------------------------------------------------------------------------------------------------------------------------------------------------------------------------------|
| Facility-based services  | Interventions that primarily focused on changes to protocols or services within facilities.                                                                                                                                             |
| Community-based services | Biomedical services delivered outside the health facility.                                                                                                                                                                              |
| Community outreach       | Community-based activities to encourage use of biomedical services at health facilities, such as community sensitization campaigns, tracing activities, and facility referrals.                                                         |
| Counseling/peer support  | <u>Ongoing</u> counseling and/or peer engagement to encourage positive health outcomes, such as building demand creation, health literacy, self-efficacy and agency, and identifying and developing plans to overcome barriers to care. |
| Incentives               | At least one opportunity to receive monetary/non-monetary incentives conditional on one's use of HIV or related health services.                                                                                                        |
| mHealth                  | Using mobile devices, tablets, and other technological devices to offer health services, counseling, monitoring and evaluation, or reminders, etc.                                                                                      |

### **Results**

We identified 15,595 intervention articles. We removed 4,406 duplicates, reviewed 11,187 titles, and 245 data sources qualified for full review. Under full review we excluded 174 data sources (Fig 1): not focused on men's health (n=15), data not disaggregated by sex (n=87), non-intervention study (n=36), no comparison group (n=25), not in sub-Saharan Africa (n=7) and only included key populations (n=4) (see Figure 1).

**Figure 1.** PRISMA flow diagram

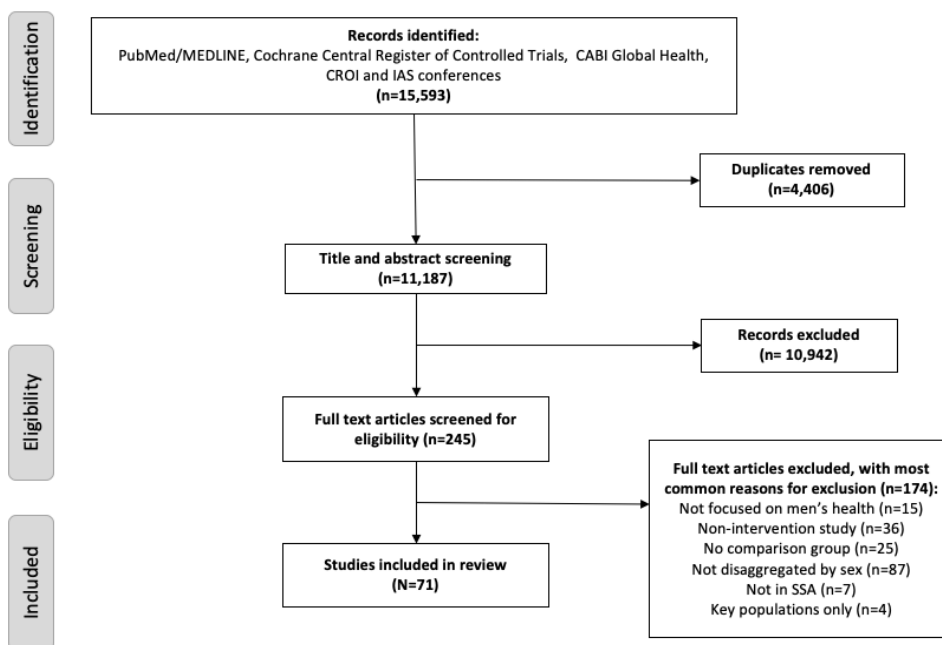

### **Settings and Populations of Included Interventions**

A total of 71 articles were included in the review. Nearly all studies were conducted in eastern and southern Africa (n=70, 99%) and a large proportion of articles were published after 2016 (n=55, 77%), representing interventions within the era of universal treatment (see Table 3). Only 7 (10%) studies examined interventions tailored exclusively to men; these focused on HIV testing (n=7) and ART linkage (n=2). A total of 19 (27%) studies targeted male partners of pregnant and/or breastfeeding women or women living with HIV, 4 (6%) studies explicitly targeted adolescents and young men and no interventions explicitly targeted middle and older age men (not shown). Most studies focused on HIV services (n=64, 90%): among those, the majority had HIV testing services as the primary outcome (n=51, 80%). Only 2 studies focused on condom use, 2 on STIs, and 3 on TB-HIV co-infection. No interventions examined the impact on PrEP for men. About 62% (n=44) were randomized control trials.

**Table 3.** Description of settings and populations included in articles (n=71)

| Service Domain      | Total | Published >2016 | Male Only Intervention | Eastern/Southern Africa | West Africa | Central Africa |
|---------------------|-------|-----------------|------------------------|-------------------------|-------------|----------------|
| Increase condom use | 2     | 0               | 0                      | 2                       | 0           | 0              |
| PrEP                | 0     | 0               | 0                      | 0                       | 0           | 0              |
| STI                 | 2     | 0               | 0                      | 2                       | 0           | 0              |
| HIV/TB-co infection | 3     | 0               | 0                      | 3                       | 0           | 0              |
| HIV testing         | 51    | 14              | 6                      | 50                      | 1           | 0              |
| HIV linkage to care | 10    | 1               | 2                      | 10                      | 0           | 0              |

|                                        |    |    |   |    |   |   |
|----------------------------------------|----|----|---|----|---|---|
| <b>HIV retention and re-engagement</b> | 3  | 0  | 0 | 3  | 0 | 0 |
| <b>Total</b>                           | 71 | 15 | 8 | 70 | 1 | 0 |

### ***Interventions Included***

A total of 111 interventions were evaluated (see Table 4). Community services was the most common intervention type (n=40, 36%), followed by community outreach (n=19; 17%), incentives (n=16; 14%) and facility services (n=16, 14%). Counseling and peer support had the least number of interventions evaluated (n=8, 7%). Interventions varied by type of service type.

**Table 4.** Description of interventions by intervention type (n=111)

| <b>Service Domain</b>      | <b>Total</b> | <b>Facility Services</b> | <b>Community Services</b> | <b>Community Outreach</b> | <b>Counseling/ Peer Support</b> | <b>Incentives</b> | <b>mHealth</b> |
|----------------------------|--------------|--------------------------|---------------------------|---------------------------|---------------------------------|-------------------|----------------|
| <b>Increase condom use</b> | 4            | 0                        | 0                         | 0                         | 4                               | 0                 | 0              |
| <b>PrEP</b>                | 0            | 0                        | 0                         | 0                         | 0                               | 0                 | 0              |
| <b>STI</b>                 | 5            | 2                        | 0                         | 3                         | 0                               | 0                 | 0              |
| <b>TB-co infection</b>     | 3            | 1                        | 1                         | 0                         | 0                               | 0                 | 1              |
| <b>HIV testing</b>         | 82           | 7                        | 37                        | 16                        | 3                               | 12                | 7              |
| <b>Linkage to care</b>     | 12           | 6                        | 2                         | 0                         | 0                               | 3                 | 1              |
| <b>Retention</b>           | 5            | 0                        | 0                         | 0                         | 1                               | 1                 | 3              |
| <b>Total</b>               | 111          | 16                       | 40                        | 19                        | 8                               | 16                | 12             |

Characteristics of included studies and study results are summarized in Table 5 and 6.



**Table 5.** All studies, stratified by service domain

| Study                                               | Study design                                | Study Year | Country                 | Setting         | Population                    | Male participants                                     | Total participants                                    | Intervention type                           | Comparison Description                                                                  | Intervention Description                                                                                                                                            |
|-----------------------------------------------------|---------------------------------------------|------------|-------------------------|-----------------|-------------------------------|-------------------------------------------------------|-------------------------------------------------------|---------------------------------------------|-----------------------------------------------------------------------------------------|---------------------------------------------------------------------------------------------------------------------------------------------------------------------|
| <b>Condom use</b>                                   |                                             |            |                         |                 |                               |                                                       |                                                       |                                             |                                                                                         |                                                                                                                                                                     |
| Kalichman, 2021                                     | RCT                                         | 2014-2017  | South Africa            | Urban           | Men and women                 | 528                                                   | 1,050                                                 | 2 Counseling/Peer support                   | SOC STI education                                                                       | (1) Risk reduction behavioral counseling<br>(2) Enhanced partner notification communication counseling                                                              |
| Speizer, 2018                                       | RCT                                         | 2010-2012  | South Africa            |                 | Men and women                 | 267                                                   | 267 couples                                           | 2 Counseling/peer support                   | Women's health counseling + male partners SOC HTC                                       | (1) Couples-based counseling delivered jointly<br>(2) Gender-focused counseling delivered separately to men and women                                               |
| <b>STI</b>                                          |                                             |            |                         |                 |                               |                                                       |                                                       |                                             |                                                                                         |                                                                                                                                                                     |
| Hoffman, 2019                                       | Cross-sectional intervention                | 2017-2018  | South Africa            | Rural           | Men and women                 | 43                                                    | 177                                                   | 1 Community outreach<br>2 Facility services | No SOC, interventions compared against each other                                       | (1) Clinic poster encouraging testing<br>(2) Training of CHW + pamphlets encouraging testing<br>(3) Training of traditional leaders + pamphlets encouraging testing |
| Strasser, 2012                                      | Pre-post intervention                       | 2009-2010  | Uganda and Zambia       | Rural and urban | Male partners and ANC clients | Uganda: 2,941<br>Zambia: 838                          | Uganda: 14,540<br>Zambia: 1,050                       | 2 Community Outreach                        | Retrospective STI data                                                                  | (1) Uganda: ANC syphilis/HIV testing + partner testing invitation letter<br>(2) Zambia: ANC syphilis/HIV testing + partner notification when positive               |
| <b>TB-HIV Co-infection: Screening and Treatment</b> |                                             |            |                         |                 |                               |                                                       |                                                       |                                             |                                                                                         |                                                                                                                                                                     |
| Kazibwe, 2021                                       | Descriptive study                           | 2018-2019  | Zambia                  | Urban           | Men and women                 | Facility: 2,142,376<br>Community case-finding: 25,690 | Facility: 6,412,387<br>Community case-finding: 49,620 | Community services                          | Systematic TB screening at points of entry at clinic                                    | Community based TB screening                                                                                                                                        |
| Gattamanchi 2021 (PLoS)                             | RCT                                         | 2018-2019  | Uganda                  | Unknown         | Men and women                 | 1,186                                                 | 1,913                                                 | mHealth                                     | SOC routine TB treatment supervision                                                    | 99DOTS supervision (daily SMS reminders and phone call dosing confirmation)                                                                                         |
| Gattamanchi 2021 (NEJM)                             | RCT                                         | 2018-2020  | Uganda                  | Rural and urban | Men and women                 | 4,243                                                 | 1,0644                                                | Facility services                           | SOC in-site sputum smear microscopy + referral based molecular testing                  | Multicomponent diagnostic strategy (on-site molecular testing for tuberculosis, guided restructuring of clinic workflows, and monthly feedback of quality metrics)  |
| <b>HIV Testing</b>                                  |                                             |            |                         |                 |                               |                                                       |                                                       |                                             |                                                                                         |                                                                                                                                                                     |
| Fylkesnes, 2013                                     | Non-random controlled trial                 | 2009-2011  | Zambia                  | Rural and urban | Men and women                 | 686                                                   | 1,501                                                 | Community services                          | SOC facility-based HIV testing                                                          | Home-based HIV testing                                                                                                                                              |
| Parker, 2015                                        | Intervention study                          | 2013       | Swaziland               | Rural           | Men and women                 | 4,001                                                 | 9,060                                                 | Community services                          | Home-based HIV testing                                                                  | Mobile HIV testing                                                                                                                                                  |
| McGovern, 2015                                      | Quasi-experimental difference-in-difference | 2009-2011  | South Africa            | Rural           | Men and women                 | 6,418                                                 | 18,478                                                | Incentives                                  | SOC home-based testing                                                                  | Non-conditional \$5 USD food vouchers + home based testing                                                                                                          |
| Krakowiak, 2016                                     | RCT                                         | 2013-2014  | Kenya                   | Rural           | Male partners and ANC clients | 601                                                   | 1,202                                                 | Community services                          | Clinic invitation for male HTC and education                                            | Home-based male partner HTC and education                                                                                                                           |
| Phiri, 2016                                         | RCT                                         | 2016-2019  | Zambia and South Africa | Rural and urban | Men and women                 | 81,454                                                | 81,454                                                | Community services                          | Home based HIV testing and counseling from female only community HIV care provider pair | Home based HTC from minimally community HIV care provider pair (male+male or male+female)                                                                           |

|                  |                       |           |                                               |                 |                               |                     |                     |                                             |                                                                       |                                                                                                                                                                                                                                                                          |
|------------------|-----------------------|-----------|-----------------------------------------------|-----------------|-------------------------------|---------------------|---------------------|---------------------------------------------|-----------------------------------------------------------------------|--------------------------------------------------------------------------------------------------------------------------------------------------------------------------------------------------------------------------------------------------------------------------|
| Chamie, 2017     | RCT                   | 2016      | Uganda                                        | Rural           | Men                           | 2,530               | 2,530               | 2 Incentives                                | Gain framed incentives (promise of prize for testing)                 | (1) Loss-framed incentives (shown small prize, taken away for not testing)<br>(2) Lotteries (chance of winning prize for testing)                                                                                                                                        |
| Medley, 2019     | Intervention study    | 2017      | South Africa                                  | Unknown         | Male partners and ANC clients | 1,166               | 2,332               | 2 Community services<br>1 Incentive         | No SOC, interventions compared against each other                     | (1) Assisted provider testing (combined facility invitation + home-based testing if needed)<br>(2) Offer of two HIVST kits for male partners + counseling pamphlet + phone credit voucher for SMS and confirming results                                                 |
| Tanser, 2021     | RCT                   | 2018      | South Africa                                  | Urban           | Men                           | 13,838              | 13,838              | 2 Incentives<br>2 mHealth                   | SOC voluntary HIV testing                                             | (1) Incentive for HIV testing (R50 [\$3] food voucher)<br>(2) Male-targeted counseling<br>(3) Incentive for HIV testing + male-targeted counseling                                                                                                                       |
| Davey, 2022      | RCT                   | 2021      | South Africa                                  |                 | Men partners and ART clients  | 0                   | 180 female partners | Community services                          | SOC referral slip for male partners index testing                     | Secondary HIVST distribution for male partner index testing                                                                                                                                                                                                              |
| Coates, 2014     | RCT                   | 2001-2011 | Zimbabwe, Tanzania, South Africa <sup>2</sup> |                 | Men and women                 | 21,182 <sup>2</sup> | 46,378 <sup>2</sup> | Community services                          | SOC facility-based HTC                                                | Community-based voluntary counseling and testing + post testing services and support groups                                                                                                                                                                              |
| Amstutz, 2020    | RCT                   | 2018      | Lesotho                                       |                 | Men and women                 | 3,507               | 7,816               | Community services                          | Home based multi disease screening and facility referral              | Home based multi-disease screening + HIVST kit distribution                                                                                                                                                                                                              |
| Choko, 2021      | RCT                   | 2018-2019 | Malawi                                        |                 | Male partners and ANC clients | 3,378               | 4,544               | 1 Incentives<br>1 Community services        | Enhanced SOC (invitation for partner HIV testing)                     | (1) Secondary HIVST distribution for male partners of ANC clients<br>(2) HIVST + \$10 USD incentive for confirmatory testing                                                                                                                                             |
| Mendelsohn, 2018 | Cross sectional study | 2015      | South Africa                                  |                 | Adolescent male and females   | 779                 | 2,235               | Facility services                           | Public clinic without youth-specific services                         | Youth only clinic + incentivized sexual and reproductive health services                                                                                                                                                                                                 |
| Maman, 2020      | RCT                   | 2013-2016 | Tanzania                                      |                 | Men                           | 1,258               | 1,258               | Incentive                                   | Social network without microfinance + peer health leadership training | Social network microfinance + peer health leadership training                                                                                                                                                                                                            |
| Cham, 2019       | Intervention study    | 2014-2017 | Tanzania                                      | Urban and rural | Men and women                 | 56,304              | 133,695             | 2 Community services                        | Provider initiated HTC                                                | (1) Home-based HTC<br>(2) Venue-based HTC                                                                                                                                                                                                                                |
| Baisley, 2012    | Cross sectional       | 2007-2008 | Tanzania                                      | Rural           | Men and women                 | 6,962               | 12,590              | Facility services                           | Opt-in voluntary HTC                                                  | Opt-out voluntary HTC                                                                                                                                                                                                                                                    |
| Labhardt, 2014   | RCT                   | 2011      | Lesotho                                       | Rural           | Men and women                 | 483                 | 2,563               | Community services                          | Door-to-door multi-disease campaign                                   | Community gathering multi-disease campaign + mobile clinic                                                                                                                                                                                                               |
| Choko, 2019      | RCT                   | 2016-2017 | Malawi                                        | Urban           | Male partners and ANC clients | 2,349               | 4,698               | 5 Community services<br>3 Incentives        | SOC invitation card for partner testing                               | (1) Secondary HIVST distribution for male partners of ANC clients<br>(2) HIVST for male partners + \$3 incentive<br>(3) HIVST for male partners + \$10 incentive<br>(4) HIVST for male partners + lottery incentive<br>(5) HIVST for male partners + phone call reminder |
| Kikumbih, 2012   | Cross sectional       | 2008-2011 | Tanzania                                      |                 | Male partners and ANC clients | 33,063              | NA                  | 1 Community outreach<br>1 Facility services | SOC PMTCT's services                                                  | Male partner combination intervention with invitation letters and posters, prioritize clients accompanied by partners, couple counseling, and HCW training on engaging male partners                                                                                     |

|                                    |                       |           |                         |                 |                               |         |                     |                                              |                                                                |                                                                                                                                                             |
|------------------------------------|-----------------------|-----------|-------------------------|-----------------|-------------------------------|---------|---------------------|----------------------------------------------|----------------------------------------------------------------|-------------------------------------------------------------------------------------------------------------------------------------------------------------|
| Derksen, 2015                      | RCT                   | 2015      | Malawi                  | Rural           | Men and women                 | NA      | NA                  | Community outreach                           | Community health meeting emphasizing personal benefit for ART  | Community sensitization emphasizing community wide treatment as prevention                                                                                  |
| Rosenberg, 2015                    | RCT                   | 2014      | Malawi                  | Urban           | Male partners and ANC clients | 0       | 200 female partners | Community outreach                           | SOC invitation for male partners to present to ANC for testing | Invitation for male partners to present to ANC+ tracing (phone and community)                                                                               |
| Thirumurthy, 2016                  | RCT                   | 2015-2016 | Kenya                   | Urban           | Male partners and ANC clients | 0       | 600 female partners | Community services                           | SOC invitation for male partners to present to ANC for testing | Secondary distribution of HIVST for male partners                                                                                                           |
| Indravuh, 2021 (BMJ Global Health) | RCT                   | 2016-2018 | Malawi                  | Rural           | Men and women                 | 2,339   | 5,490               | Community services                           | SOC facility-based HTC                                         | Door-to-door community-led HIVST + referral for linkage                                                                                                     |
| Roland, 2019                       | RCT                   | 2013-2017 | Botswana                | Rural and urban | Men and women                 | 25,111  | 49,693              | Community services                           | Mobile HIV testing                                             | Home HIV testing                                                                                                                                            |
| Geoffroy, 2018                     | Intervention study    | 2014-2017 | Malawi                  |                 | Men and women                 | 4,360   | 6,166               | Community services                           | Weekday mobile clinics over the same period                    | Targeted testing events (markets, tea estates, and churches/mosques) for HIV testing.                                                                       |
| Wirtz, 2019                        | Intervention study    | 2016-2018 | Mozambique              |                 | Men and women                 | 2,263   | 3,017               | 1 Community outreach<br>1 mHealth            | SOC facility-based HTC, no additional community activities     | Community stigma intervention (Positive Prevention session, community member dialogues, radio announcement, call-in programs, and SMS-based linkage system) |
| Odhiambo, 2020                     | Intervention study    | 2018-2019 | Kenya                   |                 | Men partners and women        | 102,347 | 102,347             | Community outreach                           | SOC facility-based HIV approaches                              | Assisted partner notification services                                                                                                                      |
| Makangila, 2020                    | Intervention study    | 2016-2019 | Zambia                  |                 | Men and women                 | 4,813   | 10,282              | 1 Community services<br>1 Community outreach | Pre-intervention male testing rates                            | Faith-based engagement intervention (faith-based leader training, virtual support, community-based services)                                                |
| Lippman, 2022                      | RCT                   | 2015-2018 | South Africa            |                 | Men and women                 | 16,853  | 38,300              | 1 Community outreach<br>1 Community services | SOC facility-based HTC, no additional community activities     | Community mobilization intervention (community testing targets, workshops, monthly meetings)                                                                |
| Phiri, 2022                        | RCT                   | 2013-2017 | Zambia and South Africa | Rural           | Men                           | 160,763 | 759,814             | 1 Community services<br>3 Community outreach | Door-to-door universal test and treat                          | (1) Community-wide "Man-up" campaigns<br>(2) Work/social places testing<br>(3) Home-based revisit with HIVST<br>(4) Community hubs                          |
| Martelli, 2022                     | Cross sectional study | 2017-2019 | Tanzania                |                 | Men and women                 | 135,312 | 255,329             | Community services                           | Facility based HIV testing                                     | Community based HIV testing campaigns + special events                                                                                                      |
| Dovel, 2019                        | RCT                   | 2018      | Malawi                  | Rural and urban | Men partners and ART clients  | 113     | 484                 | Community services                           | Standard partner referral slip by female ART client            | HIVST distribution to male partner by female ART client                                                                                                     |
| Dovel, 2020                        | RCT                   | 2017-2018 | Malawi                  | Rural and urban | Men and women                 | 2,252   | 5,885               | 2 Facility services                          | Standard provider HTC                                          | (1) Optimized provider-initiated HTC<br>(2) Facility based HIVST distribution in OPD                                                                        |
| Dancy, 2014                        | Intervention study    |           | Malawi                  | Rural           | Male and women                | 397     | 777                 | Community outreach                           | SOC facility-based HTC without tailored services               | Youth intervention (seven week sexual and reproductive health education and resources)                                                                      |
| Brown, 2011                        | RCT                   | 2008-2009 | Malawi                  | Urban           | Male partner and women        | 100     | 240                 | 2 Community outreach                         | Passive partner referral                                       | (1) Contract partner referral (7 days to contact partner, then HCW contact)<br>(2) Assisted provider partner notification                                   |

|                                |                        |           |                     |                 |                                          |                                  |                                    |                                                  |                                                                          |                                                                                                                                     |
|--------------------------------|------------------------|-----------|---------------------|-----------------|------------------------------------------|----------------------------------|------------------------------------|--------------------------------------------------|--------------------------------------------------------------------------|-------------------------------------------------------------------------------------------------------------------------------------|
| Nglazi, 2012                   | Retrospective analysis | 2008-2010 | South Africa        | Urban           | Unemployed Men                           | 9,416                            | 9,416                              | 1 Community services<br>1 Incentives             | Mobile HTC                                                               | Mobile HTC + incentive (\$10USD food voucher)                                                                                       |
| Knoblauch, 2017                | Intervention study     | 2012-2015 | Zambia              | Rural           | Men and women                            | 9,716                            | 17,202                             | Community services                               | Community HTC (offered as mobile outreach activities)                    | Workforce HTC (offered continuously at various service points accessible to mine workers)                                           |
| Amstutz, 2020                  | RCT                    | 2018      | Lesotho             |                 | Adolescents and young adults (12-24 yrs) | 1,252                            | 2,681                              | Community services                               | Home-based HIV testing                                                   | Home-based testing + HIVST for household members absent or refusing testing                                                         |
| Indravuh, 2021 (PLOS Medicine) | RCT                    | 201-2019  | Malawi              | Rural           | Adolescents, older adults and men        | 3,072                            | 7,880                              | Community services                               | Facility-based HTC                                                       | Community health group design and implementation of 7-day HIVST campaigns                                                           |
| Jeremiah, 2021                 | RCT                    | 2014-     | Malawi and Tanzania | Rural and urban | Male partners and ANC clients            | 0                                | 218 female partners                | Facility services                                | Individual ANC visits                                                    | Group ANC visits with same consistent group of women with similar expected delivery date                                            |
| Meehan, 2014                   | Intervention study     | 2011      | South Africa        | Urban           | Men and women                            | 410                              | 1,063                              | Community services                               | Facility-based HCT                                                       | Mobile HCT                                                                                                                          |
| Pettifor, 2020                 | RCT                    | 2016-2017 | South Africa        | Rural           | Male partners and young women            | 259                              | 1107                               | Community services                               | Partner referral for HTC                                                 | Young women given choice of HTC referral or HIVST to give to peer or male partner.                                                  |
| Masyuko, 2016                  | RCT                    | 2013-2015 | Kenya               | Rural and urban | Male partners and women                  | 429 index clients + 726 partners | 1119 index clients + 1286 partners | Community outreach                               | Delayed assisted partner notification (six weeks)                        | Immediate assisted partner notification                                                                                             |
| Ezeanolue, 2017                | RCT                    | 2013-2014 | Nigeria             | Urban           | Male partners and ANC clients            | 2,498                            | 5,545                              | Community services                               | Faith-based baby shower + facility referral for HIV testing and ANC care | Faith-based baby shower + health education, on-site screening and testing for HIV and other condition                               |
| Mphonda, 2014                  | Intervention study     | 2007-2009 | Malawi              | Urban           | Male partners and ANC clients            | 1,128                            | 31,194                             | 2 Counseling/Peer support<br>1 Facility services | Peer education in ANC                                                    | (1) Peer education + peer-led drama in ANC waiting area<br>(2) Peer education + male-friendly ANC clinic adjustments                |
| Nigatu, 2015                   | Cross sectional study  | 2010-2011 | Ethiopia            | Rural and urban | Men and women                            | 13,831                           | 29,639                             | Community outreach                               | SOC HIV education and testing                                            | Ongoing community engagement and active co-creation of HIV testing strategies                                                       |
| van Heerden, 2015              | RCT                    | 2011-2012 | South Africa        | Rural           | Men                                      | 90                               | 90                                 | 3 mHealth                                        | No SOC, interventions compared against each other                        | Activities after missing home-based HTC:<br>(1) Follow-up voice call<br>(2) Follow-up SMS<br>(3) Follow-up WhatsApp instant message |
| Alwano, 2019                   | RCT                    | 2013-2015 | Botswana            | Rural and urban | Men and women                            | 27,694                           | 61,655                             | 2 Community services                             | No SOC, interventions compared against each other                        | (1) Home HCT<br>(2) Mobile HCT                                                                                                      |
| Gichangi, 2018                 | RCT                    | 2015-2016 | Kenya               | Unknown         | Male partners and ANC clients            | 0                                | 1410 female partners               | 1 Community outreach<br>1 Community services     | SOC partner testing invitation card                                      | (1) Improved partner testing invitation card stating the importance of male HIV testing<br>(2) 2 HIVST + informational material     |

|                                        |                            |           |                     |                 |                                 |        |         |                                        |                                                                          |                                                                                                                                                                                                                                                                         |
|----------------------------------------|----------------------------|-----------|---------------------|-----------------|---------------------------------|--------|---------|----------------------------------------|--------------------------------------------------------------------------|-------------------------------------------------------------------------------------------------------------------------------------------------------------------------------------------------------------------------------------------------------------------------|
| Audet, 2016                            | Intervention study         | 2012-2014 | Mozambique          | Rural           | Male partners and ANC clients   | 1,772  | 7,743   | Counseling/Peer support                | SOC ANC services                                                         | Male-to-male traditional birth attendant + counseling of male partners                                                                                                                                                                                                  |
| Hyuha, 2021                            | RCT                        | 2019-2020 | Tanzania            | Urban           | Male and female trauma patients | 211    | 255     | mHealth                                | Provider-initiated HTC in emergency services                             | Provider-initiated HTC in emergency services + three SMS reminders for follow-up or retesting                                                                                                                                                                           |
| <b>HIV linkage to care</b>             |                            |           |                     |                 |                                 |        |         |                                        |                                                                          |                                                                                                                                                                                                                                                                         |
| Sibanda, 2021                          | RCT                        | 2019      | Zimbabwe            | Rural           | Men and women                   | 5,070  | 11,150  | Community services                     | Door-to-door HIVST distribution                                          | Community-led HIVST distribution                                                                                                                                                                                                                                        |
| Makurumidze, 2020                      | Retrospective cohort study | 2016-2017 | Zimbabwe            | Urban and rural | Men and women                   | 1,436  | 3,787   | Facility services                      | SOC ART initiation based on clinical stage                               | Same day ART initiation after diagnosis in facility                                                                                                                                                                                                                     |
| Boyd, 2020                             | Intervention study         | 2018-2019 | Zambia              | Urban           | Men and women                   | 87,396 | 248,002 | Facility services                      | SOC facility-based HIV services                                          | Facility workforce strengthening improved facility level documentation, enhanced counseling                                                                                                                                                                             |
| Rosen, 2019                            | RCT                        | 2017-2018 | South Africa, Kenya | Urban           | Men and women                   | 422    | 1077    | Facility services                      | ART initiation within 2 weeks                                            | Clinical algorithm for same-day ART initiation in facilities (excluding individuals with TB symptoms)                                                                                                                                                                   |
| Maskwe, 2020                           | RCT                        | 2018      | South Africa        | Urban           | Men and women                   | 220    | 593     | Facility services                      | ART initiation within 2 weeks                                            | Clinical algorithm for same-day ART initiation in facilities (including individuals with TB symptoms)                                                                                                                                                                   |
| Labhardt, 2018                         | RCT                        | 2016-2017 | Lesotho             | Rural           | Men and women                   | 47     | 137     | Community services                     | Home based HCT and referral to nearest facility                          | Home-based HCT + same-day home based initiation with 30-day supply of ART                                                                                                                                                                                               |
| Barnabas, 2020                         | RCT                        | 2017-2018 | South Africa        | Rural           | Men                             | 131    | 131     | Incentives                             | Motivational text messages                                               | 3 conditional lottery incentives (phone, data, \$100 gift card) for clinic registration, ART initiation, and viral suppression at 1, 3, and 6 months                                                                                                                    |
| Kim, 2021                              | RCT                        | 2018      | South Africa        |                 | Men                             | 2,865  | 2,865   | 2 Incentives<br>1 mHealth              | SOC                                                                      | (1) Conditional financial incentives for home-based HIV testing + linkage to care within 6 weeks (R50 [\$3] food voucher each)<br>(2) Male-targeted HIV-specific decision-support app<br>(3) Both conditional financial incentives and support app                      |
| Lawn, 2011                             | Retrospective study        | 2002-2008 | South Africa        |                 | Men and women                   | 1,277  | 3,770   | Facility services                      | SOC TB care; no HIV testing offered                                      | Provider initiated HIV testing + linkage to care in TB clinic                                                                                                                                                                                                           |
| Ahmed, 2020                            | Retrospective cohort study | 2016-2018 | Ethiopia            | Rural           | Men and women                   | 468    | 988     | Facility services                      | Clients at the same facilities who initiated ART >7 days after diagnosis | Same day ART initiation after diagnosis in facility                                                                                                                                                                                                                     |
| <b>HIV retention and re-engagement</b> |                            |           |                     |                 |                                 |        |         |                                        |                                                                          |                                                                                                                                                                                                                                                                         |
| Steward, 2021                          | RCT                        | 2014-2015 | South Africa        | Rural and urban | Men and women                   | 292    | 752     | 2 mHealth<br>1 Counseling/Peer support | SOC facility-based HIV services                                          | (1) SMS (appointment reminders, biweekly healthy living messages and twice monthly SMS check-ins)<br>(2) SMS + Peer Navigation (appointment reminders, biweekly healthy living messages and twice monthly discussions with peer navigators to address barriers to care) |
| Fahey, 2020                            | RCT                        | 2018      | Tanzania            | Urban           | Men and women                   | 200    | 530     | Incentives                             | SOC facility-based HIV services without incentives                       | (1) 6 conditional monthly incentives of \$4.50 each for clinic attendance<br>(2) 6 conditional monthly incentives of \$10.00 each for clinic attendance                                                                                                                 |

|                   |     |           |       |       |               |     |     |         |                                                       |                                                                                                                 |
|-------------------|-----|-----------|-------|-------|---------------|-----|-----|---------|-------------------------------------------------------|-----------------------------------------------------------------------------------------------------------------|
| van der Kop, 2018 | RCT | 2013-2015 | Kenya | Urban | Men and women | 281 | 700 | mHealth | SOC facility-based HIV services without text messages | Weekly interactive text messages for HIV support + follow-up phone calls when reporting challenges for one year |
|-------------------|-----|-----------|-------|-------|---------------|-----|-----|---------|-------------------------------------------------------|-----------------------------------------------------------------------------------------------------------------|

ANC; antenatal care, SOC; Standard of care HIVST; HIV self-testing HTC; HIV testing and counseling SMS; short message service, HCW; healthcare worker, DOTS; directly observed therapy; RCT; randomized controlled trial, TB; tuberculosis, STI; sexually transmitted infection

± Thailand included in study design but excluded from analysis due to low prevalence (Coates, 2014) Data only presented from Tanzania, South Africa and South Africa

**Table 6.** Study results, stratified by service domain

| Study                                               | Comparison Description                                                 | Intervention Description                                                                                                                                            | Verified/ Self-Report | Outcome Definition                                              | Outcome Time Frame           | Comparison Outcome                                                                                                                | Intervention Outcome                                                                                                                                                                                                                                                     |
|-----------------------------------------------------|------------------------------------------------------------------------|---------------------------------------------------------------------------------------------------------------------------------------------------------------------|-----------------------|-----------------------------------------------------------------|------------------------------|-----------------------------------------------------------------------------------------------------------------------------------|--------------------------------------------------------------------------------------------------------------------------------------------------------------------------------------------------------------------------------------------------------------------------|
| <b>Condom use</b>                                   |                                                                        |                                                                                                                                                                     |                       |                                                                 |                              |                                                                                                                                   |                                                                                                                                                                                                                                                                          |
| Kalichman, 2021                                     | SOC education                                                          | (1) Risk reduction behavioral counseling<br>(2) Enhanced partner notification communication counseling                                                              | V + SR                | Return STI visits<br>Condom use during vaginal intercourse      | 12 months; 3, 6 and 9 months | Return for STI visit: 29%<br>Condom use:<br>3-months: 40%<br>6-months: 41%<br>9-months: 38%                                       | (1) Risk reduction counseling--<br>Return for STI visit: 30%<br>Condom use:<br>3-months: 40%<br>6-months: 39%<br>9-months: 39%<br><br>(2) Enhanced partner notification--<br>Return for STI visit: 23%<br>Condom use:<br>3-months: 38%<br>6-months: 39%<br>9-months: 41% |
| Speizer, 2018                                       | Women's health counseling + male partners SOC HTC                      | (1) Couples-based counseling delivered jointly<br>(2) Gender-focused counseling delivered separately to men and women                                               | SR                    | Consistent condom use,<br>Partner communication about condoms   | 6 months                     | Consistent condom use: 9%<br>Partner communication about condoms: 8%                                                              | (1) Couples-based counseling delivered jointly<br>Consistent condom use: 25%<br>Partner communication to use condom: 21%<br><br>(2) Gender-focused counseling delivered separately<br>Consistent condom use: 21%*<br>Partner communication to use condom: 23%*           |
| <b>STI</b>                                          |                                                                        |                                                                                                                                                                     |                       |                                                                 |                              |                                                                                                                                   |                                                                                                                                                                                                                                                                          |
| Hoffman, 2019                                       | No SOC, interventions compared against each other                      | (1) Clinic poster encouraging testing<br>(2) Training of CHW + pamphlets encouraging testing<br>(3) Training of traditional leaders + pamphlets encouraging testing | V                     | Seeking STI care                                                | Unspecified                  | Interventions compared to each other                                                                                              | (1) 56%<br>(2) 30%<br>(3) 5%                                                                                                                                                                                                                                             |
| Strasser, 2012                                      | Retrospective STI data                                                 | (1) Uganda: ANC syphilis/HIV testing + partner testing invitation letter<br>(2) Zambia: ANC syphilis/HIV testing + partner notification when positive               | V                     | Syphilis and HIV partner testing                                | 9 months                     | (1) Uganda retrospective STI data<br>Syphilis: N/A<br>HIV: 10%<br><br>(2) Zambia retrospective STI data<br>Syphilis: 0<br>HIV: 4% | (1) Uganda: ANC syphilis/HIV testing + partner testing invitation letter<br>Syphilis: 10%<br>HIV: 13%<br><br>(2) Zambia: ANC syphilis/HIV testing + partner notification when positive<br>Syphilis: 3%<br>HIV: 4%                                                        |
| <b>TB-HIV Co-infection: Screening and Treatment</b> |                                                                        |                                                                                                                                                                     |                       |                                                                 |                              |                                                                                                                                   |                                                                                                                                                                                                                                                                          |
| Kazibwe, 2021                                       | Systematic TB screening at points of entry at clinic                   | Community based TB screening                                                                                                                                        | V                     | TB screening and diagnosis                                      | 2 years                      | Screened: 1,403,024<br>Presumed TB: 45,007<br>TB positive: 8,251                                                                  | Screened: 23,901<br>Presumed TB: 5,197<br>TB positive: 953                                                                                                                                                                                                               |
| Cattamanchi 2021 (PLoS)                             | SOC routine TB treatment supervision                                   | 99DOTS supervision (daily SMS reminders and phone call dosing confirmation)                                                                                         | V                     | TB treatment completion                                         | Unspecified                  | 71%                                                                                                                               | 87%*                                                                                                                                                                                                                                                                     |
| Cattamanchi 2021 (NEJM)                             | SOC in-site sputum smear microscopy + referral based molecular testing | Multicomponent diagnostic strategy (on-site molecular testing for tuberculosis, guided restructuring of clinic workflows,                                           | V                     | Number of patient treated for confirmed TB within 14-days of TB | 16-month period              | 147                                                                                                                               | 234                                                                                                                                                                                                                                                                      |

|                    |                                                                                         |                                                                                                                                                                                                                          |               |                                                                                                                                                |               |                                                                                                                                                       |                                                                                                                                                                                                         |
|--------------------|-----------------------------------------------------------------------------------------|--------------------------------------------------------------------------------------------------------------------------------------------------------------------------------------------------------------------------|---------------|------------------------------------------------------------------------------------------------------------------------------------------------|---------------|-------------------------------------------------------------------------------------------------------------------------------------------------------|---------------------------------------------------------------------------------------------------------------------------------------------------------------------------------------------------------|
|                    |                                                                                         | and monthly feedback of quality metrics)                                                                                                                                                                                 |               | evaluation                                                                                                                                     |               |                                                                                                                                                       |                                                                                                                                                                                                         |
| <b>HIV testing</b> |                                                                                         |                                                                                                                                                                                                                          |               |                                                                                                                                                |               |                                                                                                                                                       |                                                                                                                                                                                                         |
| Fylkesnes, 2013    | SOC facility-based HIV testing                                                          | Home-based HIV testing                                                                                                                                                                                                   | V             | HIV testing                                                                                                                                    | 1 year        | 42%                                                                                                                                                   | 76%                                                                                                                                                                                                     |
| Parker, 2015       | Home-based HIV testing                                                                  | Mobile HIV testing                                                                                                                                                                                                       | V             | HIV testing                                                                                                                                    | 12 months     | 39%                                                                                                                                                   | 42%                                                                                                                                                                                                     |
| McGovern, 2015     | SOC home-based testing                                                                  | Non-conditional \$5 USD food vouchers + home based testing                                                                                                                                                               | Not specified | HIV testing                                                                                                                                    | 1 year        | 30%                                                                                                                                                   | 42%                                                                                                                                                                                                     |
| Krakowiak, 2016    | Clinic invitation for male HTC and education                                            | Home-based male partner HTC and education                                                                                                                                                                                | SR            | HIV testing                                                                                                                                    | 6 months      | 39%                                                                                                                                                   | 87%                                                                                                                                                                                                     |
| Phiri, 2016        | Home based HIV testing and counseling from female only community HIV care provider pair | Home based HTC from minimally community HIV care provider pair (male+male or male+female)                                                                                                                                | SR            | HIV testing                                                                                                                                    | Not specified | 64%                                                                                                                                                   | 68%                                                                                                                                                                                                     |
| Chamie, 2017       | Gain framed incentives (promise of prize for testing)                                   | (1) Loss-framed incentives (shown small prize, taken away for not testing)<br>(2) Lotteries (chance of winning prize for testing)                                                                                        | V             | HIV testing                                                                                                                                    | 3 months      | 72%                                                                                                                                                   | (1) 77%<br>(2) 80%                                                                                                                                                                                      |
| Medley, 2019       | No SOC, interventions compared against each other                                       | (1) Assisted provider testing (combined facility invitation + home-based testing if needed)<br>(2) Offer of two HIVST kits for male partners + counseling pamphlet + phone credit voucher for SMS and confirming results | V             | Confirmed HIV testing                                                                                                                          | 10 months     | Interventions compared to each other                                                                                                                  | (1) 23%<br>(2) 43%                                                                                                                                                                                      |
| Tanser, 2021       | SOC voluntary HIV testing                                                               | (1) Incentive for HIV testing (R50 [\$3] food voucher)<br>(2) Male-targeted counseling<br>(3) Incentive for HIV testing + male-targeted counseling                                                                       | V             | HIV testing                                                                                                                                    | 11 months     | 18%                                                                                                                                                   | (1) 27%*<br>(2) 17%<br>(3) 27%*                                                                                                                                                                         |
| Davey, 2022        | SOC referral slip for male partners index testing                                       | Secondary HIVST distribution for male partner index testing                                                                                                                                                              | SR            | HIV testing                                                                                                                                    | 3 months      | 55%                                                                                                                                                   | 78%*                                                                                                                                                                                                    |
| Coates, 2014       | SOC facility-based HTC                                                                  | Community-based voluntary counseling and testing + post testing services and support groups                                                                                                                              | V             | HIV incidence rate                                                                                                                             | 3 years       | 119%                                                                                                                                                  | 95%                                                                                                                                                                                                     |
| Amstutz, 2020      | Home based multi disease screening and facility referral                                | Home based multi-disease screening + HIVST kit distribution                                                                                                                                                              | V             | HIV testing                                                                                                                                    | 4.5 months    | 44%                                                                                                                                                   | 74%*                                                                                                                                                                                                    |
| Choko, 2021        | Enhanced SOC (invitation for partner HIV testing)                                       | (1) Secondary HIVST distribution for male partners of ANC clients<br>(2) HIVST + \$10 USD incentive for confirmatory testing                                                                                             | SR            | ANC Cohort:<br>Proportion of male partners tested at 28 days<br><br>Index Partner Cohort:<br>Geometric mean # of new HIV+ partners per cluster | 8 months      | ANC cohort<br>Proportion of male partners tested 35%<br><br>Index Partner Cohort:<br>Geometric mean # of new HIV+ partners per cluster 1.35 (SD 1.62) | ANC Cohort:<br>Proportion of male partners tested<br>(1) 73%*<br>(2) 65%*<br><br>Index Partner Cohort:<br>Geometric mean # of new HIV+ partners per cluster<br>(1) 1.91 (SD 1.78)<br>(2) 3.20 (SD 3.81) |



|                                    |                                                                       |                                                                                                                                                                                                                                                                          |        |                                                           |                  |                                                                 |                                                                                                                                                                                                                                                                                                                                                                                                                                         |
|------------------------------------|-----------------------------------------------------------------------|--------------------------------------------------------------------------------------------------------------------------------------------------------------------------------------------------------------------------------------------------------------------------|--------|-----------------------------------------------------------|------------------|-----------------------------------------------------------------|-----------------------------------------------------------------------------------------------------------------------------------------------------------------------------------------------------------------------------------------------------------------------------------------------------------------------------------------------------------------------------------------------------------------------------------------|
| Mendelsohn, 2018                   | Public clinic without youth-specific services                         | Youth only clinic + incentivized sexual and reproductive health services                                                                                                                                                                                                 | V      | HIV testing                                               | 12 months        | 4%                                                              | 12%                                                                                                                                                                                                                                                                                                                                                                                                                                     |
| Maman, 2020                        | Social network without microfinance + peer health leadership training | Social network microfinance + peer health leadership training                                                                                                                                                                                                            | SR     | STI prevalence<br>Unprotected sex<br>HIV testing          | 30 months        | STI prevalence: 27%<br>Unprotected sex: 69%<br>HIV testing: 47% | STI prevalence: 28%<br>Unprotected sex: 64%<br>HIV testing: 53%                                                                                                                                                                                                                                                                                                                                                                         |
| Cham, 2019                         | Provider initiated HTC                                                | (1) Home-based HTC<br>(2) Venue-based HTC                                                                                                                                                                                                                                | V      | HIV testing                                               | 2 years 6 months | 35%                                                             | (1) 47%<br>(2) 69%                                                                                                                                                                                                                                                                                                                                                                                                                      |
| Baisley, 2017                      | Opt-in voluntary HTC                                                  | Opt-out voluntary HTC                                                                                                                                                                                                                                                    | V      | HIV testing                                               | 1 year           | 75%                                                             | 76%                                                                                                                                                                                                                                                                                                                                                                                                                                     |
| Labhardt, 2014                     | Door-to-door multi-disease campaign                                   | Community gathering multi-disease campaign + mobile clinic                                                                                                                                                                                                               | V      | HIV testing                                               | 1 month          | 94%                                                             | 92%                                                                                                                                                                                                                                                                                                                                                                                                                                     |
| Choko, 2019                        | SOC invitation card for partner testing                               | (1) Secondary HIVST distribution for male partners of ANC clients<br>(2) HIVST for male partners + \$3 incentive<br>(3) HIVST for male partners + \$10 incentive<br>(4) HIVST for male partners + lottery incentive<br>(5) HIVST for male partners + phone call reminder | SR     | Male partners HIV testing + linkage to care in 28 days    | 11 months        | 17%                                                             | Testing + linkage (geometric mean)/Male partners tested (% tested):<br>(1) Secondary HIVST distribution for male partners of ANC clients<br>17.5% / 92.1%<br>(2) HIVST for male partners + \$3 incentive<br>40.9% / 90.9%<br>(3) HIVST for male partners + \$10 incentive:<br>51.7% / 94.3%<br>(4) HIVST for male partners + lottery incentive:<br>18.6% / 87.0%<br>(5) HIVST for male partners + phone call reminder:<br>22.3% / 95.4% |
| Kikumbih, 2012                     | SOC PMTCT services                                                    | Male partner combination intervention with invitation letters and posters, prioritize clients accompanied by partners, couple counseling, and HCW training on engaging male partners                                                                                     | V      | Male partner HIV testing                                  | 3 years          | 7%                                                              | Year 1: 30%<br>Year 2: 40%<br>Year 3: 50%                                                                                                                                                                                                                                                                                                                                                                                               |
| Derksen, 2015                      | Community health meeting emphasizing personal benefit for ART         | Community sensitization emphasizing community wide treatment as prevention                                                                                                                                                                                               | V      | HIV testing                                               | 3 months         | 1.7%                                                            | 2.3%                                                                                                                                                                                                                                                                                                                                                                                                                                    |
| Rosenberg, 2015                    | SOC invitation for male partners to present to ANC for testing        | Invitation for male partners to present to ANC + tracing (phone and community)                                                                                                                                                                                           | V      | Percentage of partners presenting for couples HIV testing | 10 months        | 52%                                                             | 74%*                                                                                                                                                                                                                                                                                                                                                                                                                                    |
| Thirumurthy, 2016                  | SOC invitation for male partners to present to ANC for testing        | Secondary distribution of HIVST for male partners                                                                                                                                                                                                                        | SR     | Partner HIV testing within 3 months                       | 17 months        | 52%                                                             | 91%*                                                                                                                                                                                                                                                                                                                                                                                                                                    |
| Indravuh, 2021 (BMJ Global Health) | SOC facility-based HTC                                                | Door-to-door community-led HIVST + referral for linkage                                                                                                                                                                                                                  | SR + V | HIV testing in the last 12 months                         | 16 months        | 42%                                                             | 65%*                                                                                                                                                                                                                                                                                                                                                                                                                                    |
| Roland, 2019                       | Mobile HIV testing                                                    | Home HIV testing                                                                                                                                                                                                                                                         | V      | HIV testing                                               | 5 years          | 67%                                                             | 33%                                                                                                                                                                                                                                                                                                                                                                                                                                     |
| Geoffroy, 2018                     | Weekday mobile clinics over the same period                           | Targeted testing events (markets, tea estates, and churches/mosques) for HIV testing.                                                                                                                                                                                    | V      | HIV testing                                               | 3.5 years        | 26%                                                             | 71%                                                                                                                                                                                                                                                                                                                                                                                                                                     |

|                 |                                                            |                                                                                                                                                             |        |                                                                                                            |           |                                                                                                                                                                                                                                                 |                                                                                                                                                                                                                                                                                                                                                                                                 |
|-----------------|------------------------------------------------------------|-------------------------------------------------------------------------------------------------------------------------------------------------------------|--------|------------------------------------------------------------------------------------------------------------|-----------|-------------------------------------------------------------------------------------------------------------------------------------------------------------------------------------------------------------------------------------------------|-------------------------------------------------------------------------------------------------------------------------------------------------------------------------------------------------------------------------------------------------------------------------------------------------------------------------------------------------------------------------------------------------|
| Wirtz, 2011     | SOC facility-based HTC, no additional community activities | Community stigma intervention (Positive Prevention session, community member dialogues, radio announcement, call-in programs, and SMS-based linkage system) | SR     | Self-reported stigma HIV testing                                                                           | 9 months  |                                                                                                                                                                                                                                                 | aOR:1.32; 95%CI:1.01, 1.74*                                                                                                                                                                                                                                                                                                                                                                     |
| Odhiambo, 2020  | SOC facility-based HIV approaches                          | Assisted partner notification services                                                                                                                      | V      | HIV prevalence Linkage to care                                                                             | 1 year    | HIV prevalence: 0.6% Linkage to treatment: 78%                                                                                                                                                                                                  | HIV prevalence: 12% Linkage to treatment: 84%*                                                                                                                                                                                                                                                                                                                                                  |
| Makangila, 2020 | Pre-intervention male testing rates                        | Faith-based engagement intervention (faith-based leader training, virtual support, decentralized services)                                                  | V      | HIV tests per month                                                                                        | 19 month  | 16                                                                                                                                                                                                                                              | 239                                                                                                                                                                                                                                                                                                                                                                                             |
| Lippman, 2022   | SOC facility-based HTC, no additional community activities | Community mobilization intervention (community testing targets, workshops, monthly meetings)                                                                | V      | Quarterly rates of HIV testing Linkage to care rate Quarterly default rate                                 | 3 years   | Testing rate: 10%* Linkage to care rate: 0.977* Quarterly default rate: 2%*                                                                                                                                                                     | Testing rate: 12%* Linkage to care rate: 0.985 Quarterly default rate: 2%*                                                                                                                                                                                                                                                                                                                      |
| Phiri, 2022     | Door-to-door universal test and treat                      | (1) Community-wide "Man-up" campaigns<br>(2) Work/social places testing<br>(3) Home-based revisit with HIVST<br>(4) Community hubs                          | V + SR | Men reached HIV testing HIV+                                                                               | 4 years   | Door-to-door only year 1:<br>Men reached: 73%<br>HIV testing: 66%<br>HIV+: 5%<br>Door-to-door only year 2:<br>Men reached: 63%<br>HIV testing: 65%<br>HIV+: 3%<br>Door-to-door only year 3:<br>Men reached: 46%<br>HIV testing: 77%<br>HIV+: 3% | (1) Community-wide "Man-up" campaigns<br>Additional men reached: 1%<br>HIV testing: 83%<br>HIV+: 3%<br>(2) Work/social places testing<br>Additional men reached: 1%<br>HIV testing: 100%<br>HIV+: 10%<br>(3) Home-based revisit with HIVST<br>Additional men reached: 16%<br>HIV testing: 77%<br>HIV+: 2%<br>(4) Community hubs:<br>Additional men reached: 36%<br>HIV testing: 95%<br>HIV+: 2% |
| Martelli, 2022  | Facility based HIV testing                                 | Community based HIV testing campaigns + special events                                                                                                      | V      | HIV testing                                                                                                | 2 years   | 46%                                                                                                                                                                                                                                             | 54%                                                                                                                                                                                                                                                                                                                                                                                             |
| Dovel, 2020     | Standard partner referral slip by female ART client        | HIVST distribution to male partner by female ART client                                                                                                     | SR     | HIV testing among male index partners                                                                      | 4 months  | 39%                                                                                                                                                                                                                                             | 89%*                                                                                                                                                                                                                                                                                                                                                                                            |
| Dovel, 2020     | Standard provider HTC                                      | (1) Optimized provider-initiated HTC<br>(2) Facility based HIVST distribution in OPD                                                                        | SR     | HIV testing on day of enrollment                                                                           | 6 months  | 14%                                                                                                                                                                                                                                             | (1) 15%<br>(2) 47%                                                                                                                                                                                                                                                                                                                                                                              |
| Dancy, 2014     | SOC facility-based HTC without tailored services           | Youth intervention (seven week sexual and reproductive health education and resources)                                                                      | SR     | HIV test in the last 12 months among men aged 13-15<br>HIV test in the last 12 months among men aged 16-19 | 7 months  | HIV test in the last 12 months among men aged 13-15: 4%<br>HIV test in the last 12 months among men aged 16-19: 16%                                                                                                                             | HIV test in the last 12 months among men aged 13-15: 6%<br>HIV test in the last 12 months among men aged 16-19: 25%                                                                                                                                                                                                                                                                             |
| Brown, 2011     | Passive partner referral                                   | (1) Contract partner referral (7 days to contact partner, then HCW contact)<br>(2) Assisted provider partner notification                                   | V      | Partner visit to clinic within 30 days                                                                     | 11 months | 16%                                                                                                                                                                                                                                             | (1) 52%<br>(2) 51%                                                                                                                                                                                                                                                                                                                                                                              |
| Nglazi, 2012    | Mobile HTC                                                 | Mobile HTC + incentive (\$10USD food voucher)                                                                                                               | SR, V  | First-time testers HIV positivity rate                                                                     | 2 years   | First-time testers: 4.2%<br>HIV positivity rate: 6%                                                                                                                                                                                             | First-time testers: 60%<br>HIV positivity rate: 17%                                                                                                                                                                                                                                                                                                                                             |

|                                |                                                                          |                                                                                                                                     |    |                                                                                |                  |                                                                                                               |                                                                                                            |
|--------------------------------|--------------------------------------------------------------------------|-------------------------------------------------------------------------------------------------------------------------------------|----|--------------------------------------------------------------------------------|------------------|---------------------------------------------------------------------------------------------------------------|------------------------------------------------------------------------------------------------------------|
| Knoblauch, 2017                | Community HTC (offered as mobile outreach activities)                    | Workforce HTC (offered continuously at various service points accessible to mine workers)                                           | V  | HIV testing<br>HIV positivity rate                                             | 3 years          | Year 1: 37%, 2.5% positivity rate<br>Year 2: 42%, 3.2% positivity rate<br>Year 3: 37.9%, 1.9% positivity rate | Year 1: 97%, 5.3% positivity rate<br>Year 2: 95%, 3.1% positivity rate<br>Year 3: 95% 4.2% positivity rate |
| Amsutz, 2020                   | Home-based HIV testing                                                   | Home-based testing + HIVST for household members absent or refusing testing                                                         | V  | HIV testing                                                                    | 4.5 months       | 25%                                                                                                           | 70%*                                                                                                       |
| Indravuh, 2021 (PLOS Medicine) | SOC facility-based HTC                                                   | Community health group design and implementation of 7-day HIVST campaigns                                                           | SR | Lifetime testing for adolescents<br>Recent HIV testing (last 3 months) for men | 3.5 months       | Lifetime testing for adolescents: 57%<br>Recent HIV testing (last 3 months) for men: 34%                      | Lifetime testing for adolescents: 80%<br>Recent HIV testing (last 3 months) for men: 75%                   |
| Jeremiah, 2021                 | Individual ANC visits                                                    | Group ANC visits with same consistent group of women with similar expected delivery date                                            | SR | Male partner HIV testing                                                       | 12 months        | 45%                                                                                                           | 55%                                                                                                        |
| Meehan, 2011                   | Facility-based HCT                                                       | Mobile HCT                                                                                                                          | V  | HIV testing                                                                    | 3 months         | 27%                                                                                                           | 51%*                                                                                                       |
| Pettifor, 2020                 | SOC partner referral for HTC                                             | Young women given choice of HTC referral or HIVST to give to peer or male partner.                                                  | SR | Gave at least one test/referral to a male partner at 3 months                  | 9 months         | 6%                                                                                                            | 18%                                                                                                        |
| Masyuko, 2016                  | Delayed assisted partner notification (six weeks)                        | Immediate assisted partner notification                                                                                             | NA | HIV testing of male partners                                                   | 23 months        | 11%                                                                                                           | 64%                                                                                                        |
| Ezeanolue, 2017                | Faith-based baby shower + facility referral for HIV testing and ANC care | Faith-based baby shower + health education, on-site screening and testing for HIV and other condition                               | V  | HIV testing of male partner during pregnancy                                   | 9 months         | 38%                                                                                                           | 84%*                                                                                                       |
| Mphonda, 2014                  | Peer education in ANC                                                    | (1) Peer education + peer-led drama in ANC waiting area<br>(2) Peer education + male-friendly ANC clinic adjustments                | V  | Couples HIV testing                                                            | 3 years          | 1%                                                                                                            | (1) 6%<br>(2) 11%                                                                                          |
| Nigatu, 2015                   | HIV education and testing                                                | Ongoing community engagement and active co-creation of HIV testing strategies                                                       | SR | HIV testing                                                                    | 1 year           | HIV testing: 39%                                                                                              | HIV testing: 60%                                                                                           |
| van Heerden, 2015              | No SOC, interventions compared against each other                        | Activities after missing home-based HTC:<br>(1) Follow-up voice call<br>(2) Follow-up SMS<br>(3) Follow-up WhatsApp instant message | SR | HIV testing                                                                    | 10 months        | Interventions compared to each other                                                                          | (1) 10%<br>(2) 0%<br>(3) 3%                                                                                |
| Alwano, 2019                   | No SOC, interventions compared against each other                        | (1) Home HCT<br>(2) Mobile HCT                                                                                                      | V  | HIV testing<br>HIV+                                                            | 3 years 2 months | Interventions compared to each other                                                                          | (1) 41%<br>(2) 55%                                                                                         |
| Gichangi, 2018                 | SOC partner testing invitation card                                      | (1) Improved partner testing invitation card stating the importance of male HIV testing<br>(2) 2 HIVST+ informational material      | SR | Male partner HIV testing                                                       | 6 months         | 27%                                                                                                           | (1) 35%<br>(2) 79%                                                                                         |
| Audet, 2017                    | SOC ANC services                                                         | Male-to-male traditional birth attendant + counseling of male partners                                                              | V  | Male partner HIV testing                                                       | 21 months        | 8%                                                                                                            | 34%                                                                                                        |

|                                        |                                                                          |                                                                                                                                                                                                                                                    |    |                                                                                                 |           |                                                           |                                                         |
|----------------------------------------|--------------------------------------------------------------------------|----------------------------------------------------------------------------------------------------------------------------------------------------------------------------------------------------------------------------------------------------|----|-------------------------------------------------------------------------------------------------|-----------|-----------------------------------------------------------|---------------------------------------------------------|
| Hyuha, 2021                            | Provider-initiated HTC in emergency services                             | Provider-initiated HTC in emergency services + three SMS reminders for follow-up or retesting or linkage to care                                                                                                                                   | V  | HIV- who were retested<br>Linkage to care                                                       | 5 months  | HIV- who were retested: 16%<br>Linkage to care: 75% (3/4) | % HIV- who were retested: 59%*<br>Linkage to care: 100% |
| <b>HIV linkage to care</b>             |                                                                          |                                                                                                                                                                                                                                                    |    |                                                                                                 |           |                                                           |                                                         |
| Sibanda, 2021                          | Door-to-door HIVST distribution                                          | Community-led HIVST distribution                                                                                                                                                                                                                   | SR | Linkage to confirmatory testing, PrEP or VMMC within 4 months                                   | 12 months | 34%                                                       | 39%*                                                    |
| Ma kurumidze, 2020                     | SOC ART initiation based on clinical stage                               | Same day ART initiation after diagnosis in facility                                                                                                                                                                                                | V  | Linkage to care                                                                                 | 4 month   | 36%                                                       | 39%*                                                    |
| Boyd, 2020                             | SOC facility-based HIV services                                          | Facility workforce strengthening improved facility level documentation, enhanced counseling                                                                                                                                                        | V  | Linked to care (receiving ART)                                                                  | 18 months | 34%                                                       | 35%                                                     |
| Rosen, 2019                            | ART initiation within 2 weeks                                            | Clinical algorithm for same-day ART initiation in facilities (excluding individuals with TB symptoms)                                                                                                                                              | V  | ART initiation                                                                                  | 28 days   | 74%                                                       | 85%                                                     |
| Maskwe, 2020                           | ART initiation within 2 weeks                                            | Clinical algorithm for same-day ART initiation in facilities (including individuals with TB symptoms)                                                                                                                                              | V  | ART initiation                                                                                  | 28 days   | 66%                                                       | 90%                                                     |
| Labhardt, 2018                         | Home based HCT and referral to nearest facility                          | Home-based HCT + same-day home based initiation with 30-day supply of ART                                                                                                                                                                          | SR | Linkage-to-care (attended health facility at least once within 90 days of enrollment)           | 90 days   | 34%                                                       | 66%                                                     |
| Barnabas, 2020                         | Motivational text messages                                               | 3 conditional lottery incentives (phone, data, \$100 gift card) for clinic registration, ART initiation, and viral suppression at 1, 3, and 6 months                                                                                               | V  | ART initiation                                                                                  | 6 months  | 76%                                                       | 93%                                                     |
| Kim, 2021                              | SOC voluntary HIV testing                                                | (1) Conditional financial incentives for home-based HIV testing + linkage to care within 6 weeks (R50 [\$3] food voucher each)<br>(2) Male-targeted HIV-specific decision-support app<br>(3) Both conditional financial incentives and support app | V  | Number of men linked to care (new initiation or re-start of ART) within 6 weeks of a home visit | 11 months | 37                                                        | (1) 16<br>(2) 26<br>(3) 13                              |
| Lawn, 2011                             | SOC TB care; no HIV testing offered                                      | Provider initiated HIV testing + linkage to care in TB clinic                                                                                                                                                                                      | V  | Linkage to care (enrolled in ART by year)                                                       | 6 years   | 28%                                                       | Year 1: 35%<br>Year 2: 39%<br>Year 3: 36%*              |
| Ahmed, 2020                            | Clients at the same facilities who initiated ART >7 days after diagnosis | Same day ART initiation after diagnosis in facility                                                                                                                                                                                                | NA | ART retention 6-months after initiation (defined as <30 days late for clinic visit)             | 6 months  | 88%                                                       | 77%                                                     |
| <b>HIV retention and re-engagement</b> |                                                                          |                                                                                                                                                                                                                                                    |    |                                                                                                 |           |                                                           |                                                         |

|                   |                                                       |                                                                                                                                                                                                                                                                         |   |                            |           |     |                    |
|-------------------|-------------------------------------------------------|-------------------------------------------------------------------------------------------------------------------------------------------------------------------------------------------------------------------------------------------------------------------------|---|----------------------------|-----------|-----|--------------------|
| Steward, 2021     | SOC facility-based HIV services                       | (1) SMS (appointment reminders, biweekly healthy living messages and twice monthly SMS check-ins)<br>(2) SMS + Peer Navigation (appointment reminders, biweekly healthy living messages and twice monthly discussions with peer navigators to address barriers to care) | V | Retention in care          | 12 months | 36% | (1) 34%<br>(2) 50% |
| Fahey, 2020       | SOC facility-based HIV services without incentives    | (1) 6 conditional monthly incentives of \$4.50 each for clinic attendance<br>(2) 6 conditional monthly incentives of \$10.00 each for clinic attendance                                                                                                                 | V | Retention in care          | 6 months  | 84% | (1) 88%<br>(2) 91% |
| van der Kop, 2018 | SOC facility-based HIV services without text messages | Weekly interactive text messages for HIV support + follow-up phone calls when reporting challenges for one year                                                                                                                                                         | V | 12-month retention in care | 25 months | 80% | 76%                |

ANC; antenatal care, SOC; Standard of care HIVST; HIV self-testing HTC; HIV testing and counseling SMS; short message service, HCW; healthcare worker, DOTS; directly observed therapy; RCT; randomized controlled trial, TB; tuberculosis, STI; sexually transmitted infection  
\* $p < 0.05$

± Thailand included in study design but excluded from analysis due to low prevalence (Coates, 2014) Data only presented from Tanzania, South Africa and South Africa

### **Facility Services**

There were no interventions examining the impact of facility-based interventions on men's use of condoms or PrEP services. Two interventions examined facility-based interventions for STI services and found that including clinic-based education (i.e., posters and pamphlets) and HCW training improved STI identification compared to traditional leader screening campaigns.<sup>31</sup> One facility service intervention was included for TB-HIV co-infection and found that multicomponent diagnostic strategies improved co-infection diagnostics.<sup>32</sup>

Seven facility-based interventions focused on HIV testing as the primary outcome.<sup>33–38</sup> Youth clinics,<sup>33</sup> HCW sensitization on engaging male partners,<sup>35</sup> and male-friendly spaces within ANC clinics<sup>37,38</sup> improved men's testing uptake. Offering opt-out HIV testing to men already attending health facilities has a wide reach but minimal impact<sup>34,36</sup> unless paired with HIV self-testing (HIVST) strategies, which can dramatically increase testing coverage for men attending facilities.<sup>36</sup>

Six facility-based interventions focused on linkage to ART services after a reactive HIV test.<sup>39–44</sup> Same-day initiation is strongly associated with linkage,<sup>39,41,42</sup> although there is mixed evidence on impact on retention.<sup>44</sup> Interventions that improve facility documentation to support enhanced counseling increased ART initiation,<sup>40</sup> as did integrating TB and HIV services within the TB clinic.<sup>43</sup>

There were no facility-based interventions focused on improving retention.

### **Community Services**

There were no interventions examining the impact of community service interventions on use of condoms, PrEP, or STI services. One intervention for TB-HIV co-infection found that community-based TB screening increased screening efforts but decreased presumed TB and TB positive cases identified.<sup>45</sup>

There were a total of 39 community service interventions focused on HIV testing – 17 interventions distributed HIVST to men (primary or secondary distribution),<sup>46–58</sup> 15 provided community/workforce testing (non-HIVST),<sup>52,53,55,59–71</sup> and 11 provided home-based HIV testing services.<sup>46,54,61,69,72–75</sup> Community services outperformed standard of care facility services<sup>48,52,60,61,65,67,72,73</sup> and mobile and targeted venue testing such as work were more cost efficient and had greater reach than home-based testing.<sup>53,59,61,63,69,70,74</sup> Notably no study compared a community service to a facility-based intervention (outside standard of care). Faith-based events and events around pregnancy can increase men's testing during critical life periods.<sup>63,64,68</sup>

Primary distribution of HIVST increased reach testing.<sup>48,52,53,55</sup> Secondary HIVST distribution increased testing among men when given to female partners living with HIV as part of index testing,<sup>47,58</sup> ANC clients,<sup>49–51,57</sup> young women,<sup>56</sup> and when HIVST was left for male adults and adolescents who were not home during door-to-door distribution.<sup>48,54</sup>

Only one community service intervention examined the impact on linkage for men. Same-day initiation at home immediately after home-based testing increased ART initiation rates.<sup>62</sup> No community service interventions examined the impact on men's retention in HIV care.

### ***Community Outreach***

There were no interventions examining the impact of community outreach interventions on use of condoms, PrEP or TB-HIV co-infection. Three community outreach interventions for STI testing or treatment were found.<sup>31,76</sup> Community sensitization through traditional leaders was not as effective as facility-based sensitization for increasing men's treatment for STI services,<sup>31</sup> while partner invitation letters for STI + HIV testing of male partners of ANC clients (using an index testing approach) showed little to no impact on syphilis testing.<sup>76</sup>

There were 16 interventions for HIV testing with community outreach.<sup>35,53,57,64,71,77-84</sup> Most were male partner testing strategies and reached men through invitation letters and a variety of community sensitization strategies.<sup>35,57,78,80,82,83</sup> Partner invitations combined with male-friendly services at the health facility or active tracing were usually effective.<sup>35,78,82,83</sup> One study found that simply distributing HIVST kits dramatically increased men's testing compared to partner invitations.<sup>57</sup> A few interventions used community sensitization to improve knowledge and motivation for HIV services,<sup>53,64,71,84</sup> such as expanding knowledge of treatment as prevention,<sup>77</sup> reducing stigma<sup>79</sup> and youth-specific education,<sup>81</sup> with mixed impact.

There were no interventions examining community outreach interventions for ART initiation and retention.

### ***Counseling / Peer Support***

Four interventions examined the impact of counseling and/or peer support on condom use – all found that couples and male-only counseling groups increased condom use and partner communication about condoms.<sup>85,86</sup> Three interventions examined the impact of counseling and/or peer support on HIV testing. Peer education and mentorship increased couples testing for male partners of ANC clients.<sup>38,87</sup> Peer navigation and mentorship also improved ART retention when compared to standard of care and SMS messages alone.<sup>88</sup>

### ***Incentives***

Twelve interventions examined the impact of incentives on HIV testing, with mixed findings.<sup>46,49,50,66,89-92</sup> Incentives improved HIVST result reporting.<sup>46,49,50</sup> Three interventions examined incentives for ART linkage with mixed results.<sup>93,94</sup> One intervention examined the impact of incentives on retention.<sup>95</sup>

### ***mHealth***

One mHealth intervention examined the impact on TB treatment completion among TB/HIV co-infections and found that SMS reminders and phone calls for direct observation therapy improved treatment completion when implemented with fidelity.<sup>96</sup> mHealth alone showed mixed effects on HIV testing<sup>91,97</sup> but mHealth in combination with other interventions were effective.<sup>79,91</sup>

## Discussion

In this scoping review of interventions, we were unable to identify cross-cutting strategies to reach men across HIV and related health services in sub-Saharan Africa, largely because there is little evidence outside HIV testing interventions. Nearly half of all interventions targeted HIV testing, 13% ART initiation, and 6% retention, while only a handful targeted condom use, STIs or TB-HIV co-infection. Over a quarter of interventions targeted male partners, usually of ANC clients, and only 7 interventions exclusively targeted men as clients. Almost half of interventions took place in the community, with about one-fifth focusing on changes to facility services and another one-fifth providing community outreach. Few interventions focused on counseling and peer support or mHealth strategies. The limited evidence available points to the fact that men need convenience, active outreach, and improved experiences with health services. The same principles may apply to all services intended to reach men, including sexual health and TB-HIV coinfection services.

There is extensive knowledge about community-based services, especially for HIV testing. Self-testing strategies that are convenient and give men autonomy are highly effective and may provide important lessons for other services. For example, STI and TB services may promote self-care through STI self-testing<sup>98</sup> and self-monitoring TB adherence. HIVST may also be used to promote PrEP uptake,<sup>99</sup> although there is no evidence to date for men..

Sex disaggregation within manuscripts and conference abstracts is still not commonplace. The lack of sex-disaggregated outcomes is especially challenging given that men in SSA are often underrepresented in HIV studies. Multiple studies in our scoping review found that men's outcomes were much worse than women, even in intervention arms. We strongly recommend that sex-disaggregated results become part of all primary data analysis plans and be presented whenever possible, including primary outcome articles and abstracts.

Evidence on interventions for men in SSA have several glaring gaps that must be addressed. First, there is very little evidence about interventions to improve linkage to care, retention, condom use, PrEP, STIs, and TB-HIV coinfection among men. There is almost no synergy across services, which may partly explain why so little progress has been made to improve men's use of services to date. We know from qualitative and description studies what men need to make health services work for them. Easy access, quality services, positive patient-provider interactions, and for some men, tailored direct client support are required.<sup>15,100,101</sup> However, we know very little about *how* to meet these needs for men outside of HIV testing. HIV testing services are the starting point for evidence since that's where most evidence has been collected. But it should be the springboard for producing evidence on cross-service, holistic approaches to engaging men. We have more work to do to understand how to make cross-cutting improvements across services. Multi-disease approaches for HIV and NCDs have proven effective within community screening interventions<sup>102</sup> and should be explored, particularly for HIV and related services such as prevention, STI diagnosis and treatment and TB-HIV co-infection.

Second, there is very little evidence on counseling and peer support for men, and nearly no evidence on how to improve quality services, especially HCW-client interactions, client agency, and client satisfaction



with services received. Emerging evidence shows that equitable, positive, and trusting HCW interactions are critical to men’s continued use of services, as well as men’s satisfaction with services.<sup>100,103,104</sup> Recent studies suggest that positive interactions with peer HCWs and HIV messaging that resonates with men’s priorities can lead to positive ART retention outcomes<sup>105,106</sup> and should be explored for other health services. Further research is needed to understand how to best support positive interactions with HCWs and equip HCWs to interact with men well. Across the region, HCWs report implicit bias toward men as clients, misunderstand men and are unsure how to engage men well.<sup>107–109</sup> HCWs often describe men as “difficult”, “too powerful” and simply unable to be “good clients.”<sup>107</sup> Misconceptions and implicit bias stem from a lack of understanding, experience, and professional skills/tools to engage a client population well. This can change. One strategy is to provide HCW sensitization trainings and job aids on how to interact with men as clients.

Our scoping review has several limitations. First, nearly all evidence from southern and eastern Africa and may not be representative of what works in western and northern Africa. Second, we exclude articles and abstracts without a comparison group to ensure quality. Numerous programmatic and qualitative evaluations are now being completed and may provide useful insights into the needs of men and strategies that work – this literature should be explored further regarding cross-cutting strategies to reach men. Third, we include articles across a wide range of years. Effective strategies may shift over time as local epidemics change. Finally, we only included articles that were published in English.

## Conclusion

This review highlights the need for additional research on cross-cutting strategies to improve men’s engagement in HIV and related health services. The limited evidence available suggests that convenient services, actively engaging men, and providing positive experiences with health services largely improve service utilization. Additional evidence is needed for PrEP use and non-HIV services (such as STI and TB co-infection).

## Acknowledgements

We are to grateful to all members of the WHO and UNAIDS Men and HIV technical Working Group (MENHT) who supported this work and to Misheck Mphande and Isabella Robson who supported collection of articles.

## References

1. AIDSinfo | UNAIDS. Accessed February 21, 2023. <https://aidsinfo.unaids.org/>
2. Cornell M, Majola M, Johnson LF, Dubula-Majola V. HIV services in sub-Saharan Africa: the greatest gap is men. *The Lancet*. 2021;397(10290):2130-2132.
3. *World Health Statistics 2019: Monitoring Health for the SDGs, Sustainable Development Goals*. World Health Organization; 2019.

4. Hawkes S, Buse K. Gender and global health: evidence, policy, and inconvenient truths. *The lancet*. 2013;381(9879):1783-1787.
5. Lim SS, Vos T, Flaxman AD, et al. A comparative risk assessment of burden of disease and injury attributable to 67 risk factors and risk factor clusters in 21 regions, 1990–2010: a systematic analysis for the Global Burden of Disease Study 2010. *The lancet*. 2012;380(9859):2224-2260.
6. *Global Progress Report on HIV, Viral Hepatitis and Sexually Transmitted Infections, 2021*. Accessed February 24, 2023. <https://www.who.int/publications-detail-redirect/9789240027077>
7. Chihana ML, Huerga H, Van Cutsem G, et al. Distribution of advanced HIV disease from three high HIV prevalence settings in Sub-Saharan Africa: a secondary analysis data from three population-based cross-sectional surveys in Eshowe (South Africa), Ndhiwa (Kenya) and Chiradzulu (Malawi). *Glob Health Action*. 2019;12(1):1679472.
8. Baluku JB, Mukasa D, Bongomin F, et al. Gender differences among patients with drug resistant tuberculosis and HIV co-infection in Uganda: a countrywide retrospective cohort study. *BMC Infect Dis*. 2021;21:1-11.
9. Azeez A, Ndege J, Mutambayi R. Associated factors with unsuccessful tuberculosis treatment outcomes among tuberculosis/HIV coinfecting patients with drug-resistant tuberculosis. *Int J Mycobacteriology*. 2018;7(4):347-354.
10. Chen L, Jha P, Stirling B, et al. Sexual risk factors for HIV infection in early and advanced HIV epidemics in sub-Saharan Africa: systematic overview of 68 epidemiological studies. *PLoS One*. 2007;2(10):e1001.
11. Monod M, Brizzi A, Galiwango RM, et al. Growing gender disparity in HIV infection in Africa: sources and policy implications. *medRxiv*. Published online 2023:2023-03.
12. Hensen B, Taoka S, Lewis JJ, Weiss HA, Hargreaves J. Systematic review of strategies to increase men's HIV-testing in sub-Saharan Africa. *AIDS Lond Engl*. 2014;28(14):2133.
13. Hamilton A, Thompson N, Choko AT, et al. HIV self-testing uptake and intervention strategies among men in sub-Saharan Africa: a systematic review. *Front Public Health*. 2021;9:594298.
14. Hlongwa M, Mashamba-Thompson T, Makhunga S, Hlongwana K. Barriers to HIV testing uptake among men in sub-Saharan Africa: a scoping review. *Afr J AIDS Res*. 2020;19(1):13-23.
15. Hlongwa M, Mashamba-Thompson T, Makhunga S, Hlongwana K. Mapping evidence of intervention strategies to improving men's uptake to HIV testing services in sub-Saharan Africa: a systematic scoping review. *BMC Infect Dis*. 2019;19(1):1-13.

16. Hampanda KM, Pelowich K, Freeborn K, et al. Strategies to increase couples HIV testing and counselling in sub-Saharan Africa: a systematic review. *J Int AIDS Soc.* 2023;26(3):e26075.
17. Hlongwa M, Hlongwana K, Makhunga S, et al. Linkage to HIV care following HIV self-testing among men: Systematic review of quantitative and qualitative studies from six countries in Sub-Saharan Africa. *AIDS Behav.* 2023;27(2):651-666.
18. Sharma M, Ying R, Tarr G, Barnabas R. Systematic review and meta-analysis of community and facility-based HIV testing to address linkage to care gaps in sub-Saharan Africa. *Nature.* 2015;528(7580):S77-S85.
19. Dovel KL, Hariprasad S, Hubbard J, et al. Strategies to improve antiretroviral therapy (ART) initiation and early engagement among men in sub-Saharan Africa: A scoping review of interventions in the era of universal treatment. *Trop Med Int Health.* Published online 2023.
20. Kusemererwa S, Akena D, Nakanjako D, et al. Strategies for retention of heterosexual men in HIV care in sub-Saharan Africa: a systematic review. *PLoS One.* 2021;16(2):e0246471.
21. Kanyemba R, Govender K, Dzomba A, Mashamba TP, Mantell JE. HIV Focused Sexual Risk-Reduction Interventions Targeting Adolescent Boys and Young Men in Sub-Saharan Africa: A Scoping Review. *AIDS Behav.* 2023;27(10):3356-3391.
22. Ehrenkranz P, Grimsrud A, Holmes CB, Preko P, Rabkin M. Expanding the vision for differentiated service delivery: a call for more inclusive and truly patient-centered care for people living with HIV. *J Acquir Immune Defic Syndr 1999.* 2021;86(2):147.
23. Thorp M, Balakasi KT, Mphande M, et al. Factors associated with men's health facility attendance as clients and caregivers in Malawi: a community-representative survey. *BMC Public Health.* 2022;22(1):1904.
24. Gage AD, Leslie HH, Bitton A, et al. Does quality influence utilization of primary health care? Evidence from Haiti. *Glob Health.* 2018;14(1):1-9.
25. McCarthy EA, Subramaniam HL, Prust ML, et al. Quality improvement intervention to increase adherence to ART prescription policy at HIV treatment clinics in Lusaka, Zambia: A cluster randomized trial. *PLoS One.* 2017;12(4):e0175534.
26. Arksey H, O'Malley L. Scoping studies: towards a methodological framework. *Int J Soc Res Methodol.* 2005;8(1):19-32. doi:10.1080/1364557032000119616
27. Levac D, Colquhoun H, O'Brien KK. Scoping studies: advancing the methodology. *Implement Sci.* 2010;5(1):69. doi:10.1186/1748-5908-5-69

28. Tricco AC, Lillie E, Zarin W, et al. PRISMA Extension for Scoping Reviews (PRISMA-ScR): Checklist and Explanation. *Ann Intern Med*. 2018;169(7):467-473. doi:10.7326/M18-0850
29. The EndNote Team. *EndNote 20*. Clarivate; 2013.
30. Duncombe C, Rosenblum S, Hellmann N, et al. Reframing HIV care: putting people at the centre of antiretroviral delivery. *Trop Med Int Health TM IH*. 2015;20(4):430-447. doi:10.1111/tmi.12460
31. Hoffman CM, Fritz L, Matlakala N, et al. Community-based strategies to identify the unmet need for care of individuals with sexually transmitted infection-associated symptoms in rural South Africa. *Trop Med Int Health*. 2019;24(8):987-993.
32. Cattamanchi A, Reza TF, Nalugwa T, et al. Multicomponent strategy with decentralized molecular testing for tuberculosis. *N Engl J Med*. 2021;385(26):2441-2450.
33. Mendelsohn AS, Gill K, Marcus R, et al. Sexual reproductive healthcare utilisation and HIV testing in an integrated adolescent youth centre clinic in Cape Town, South Africa. *South Afr J HIV Med*. 2018;19(1).
34. Baisley K, Doyle AM, Chagalucha J, et al. Uptake of Voluntary Counselling and Testing among Young People Participating in an HIV Prevention Trial: Comparison of Opt-Out and Opt-In Strategies. *PLOS ONE*. 2012;7(7):e42108. doi:10.1371/journal.pone.0042108
35. Kikumbih N, Nielsen-Bobbit J, Mbandi A, Motta W, Killian R, Mwanga F. Will your partner be attending? Involving men in the prevention of mother-to-child transmission of HIV in antenatal care clinics in Iringa, Tanzania. In: Vol 15. International AIDS Society Conference; 2012:130-130.
36. Dovel K, Shaba F, Offorjebe OA, et al. Effect of facility-based HIV self-testing on uptake of testing among outpatients in Malawi: a cluster-randomised trial. *Lancet Glob Health*. 2020;8(2):e276-e287.
37. Jeremiah RD, Patel DR, Chirwa E, et al. A randomized group antenatal care pilot showed increased partner communication and partner HIV testing during pregnancy in Malawi and Tanzania. *BMC Pregnancy Childbirth*. 2021;21(1):1-9.
38. Mphonda SM, Rosenberg NE, Kamanga E, et al. Assessment of peer-based and structural strategies for increasing male participation in an antenatal setting in Lilongwe, Malawi. *Afr J Reprod Health*. 2014;18(2):97-104.
39. Makurumidze R, Buyze J, Decroo T, et al. Patient-mix, programmatic characteristics, retention and predictors of attrition among patients starting antiretroviral therapy (ART) before and after the implementation of HIV "Treat All" in Zimbabwe. *PLoS One*. 2020;15(10):e0240865.

40. Boyd MA, Shah M, Barradas DT, et al. Increase in antiretroviral therapy enrollment among persons with HIV infection during the Lusaka HIV Treatment Surge—Lusaka Province, Zambia, January 2018–June 2019. *Morb Mortal Wkly Rep*. 2020;69(31):1039.
41. Rosen S, Maskew M, Larson BA, et al. Simplified clinical algorithm for identifying patients eligible for same-day HIV treatment initiation (SLATE): results from an individually randomized trial in South Africa and Kenya. *PLoS Med*. 2019;16(9):e1002912.
42. Maskew M, Brennan AT, Fox MP, et al. A clinical algorithm for same-day HIV treatment initiation in settings with high TB symptom prevalence in South Africa: The SLATE II individually randomized clinical trial. *PLoS Med*. 2020;17(8):e1003226.
43. Lawn SD, Fraenzel A, Kranzer K, Caldwell J, Bekker LG, Wood R. Provider-initiated HIV testing increases access of patients with HIV-associated tuberculosis to antiretroviral treatment. *S Afr Med J*. 2011;101(4):258-262.
44. Ahmed I, Demissie M, Worku A, Gugsu S, Berhane Y. Effectiveness of same-day antiretroviral therapy initiation in retention outcomes among people living with human immunodeficiency virus in Ethiopia: empirical evidence. *BMC Public Health*. 2020;20(1):1-11.
45. Kazibwe A, Twinomugisha F, Musaaazi J, et al. Comparative yield of different active TB case finding interventions in a large urban TB project in central Uganda: a descriptive study. *Afr Health Sci*. 2021;21(3):975-984.
46. Medley AM, Lasry A, Khanyile N, et al. Outcome and cost of 3 methods for increasing male partner testing in South Africa. In: Annual Conference on Retroviruses and Opportunistic Infections (CROI); 2019.
47. Joseph Davey DL, Wall KM, Naidoo N, et al. HIV testing and linkage to ART following secondary distribution of HIV self-test kits to male partners of women living with HIV: a pilot randomized control trial in Mpumalanga, South Africa. *J Int AIDS Soc*. 2022;25(6):e25937.
48. Amstutz A, Lejone TI, Khesa L, et al. Home-based oral self-testing for absent and declining individuals during a door-to-door HIV testing campaign in rural Lesotho (HOSENG): a cluster-randomised trial. *Lancet HIV*. 2020;7(11):e752-e761.
49. Choko AT, Fielding K, Johnson CC, et al. Partner-delivered HIV self-test kits with and without financial incentives in antenatal care and index patients with HIV in Malawi: a three-arm, cluster-randomised controlled trial. *Lancet Glob Health*. 2021;9(7):e977-e988.
50. Choko AT, Corbett EL, Stallard N, et al. HIV self-testing alone or with additional interventions, including financial incentives, and linkage to care or prevention among male partners of antenatal care clinic attendees in Malawi: an adaptive multi-arm, multi-stage cluster randomised trial. *PLoS Med*. 2019;16(1):e1002719.

51. Thirumurthy H, Masters S, Obonyo B, et al. Promoting male partner and couples HIV testing through secondary distribution HIV self-tests: a randomized trial. In: Vol 19. International Aids Society Conference; 2016.
52. Indravudh PP, Fielding K, Chilongosi R, et al. Effect of door-to-door distribution of HIV self-testing kits on HIV testing and antiretroviral therapy initiation: a cluster randomised trial in Malawi. *BMJ Glob Health*. 2021;6(Suppl 4):e004269.
53. Phiri MM, Schaap A, Simwinga M, et al. Closing the gap: did delivery approaches complementary to home-based testing reach men with HIV testing services during and after the HPTN 071 (PopART) trial in Zambia? *J Int AIDS Soc*. 2022;25(1):e25855.
54. Amstutz A, Kopo M, Lejone T, et al. Oral self-testing for adolescents and young adults absent or declining to test during home-based HIV testing-a mixed-method study embedded in a cluster-randomized trial in Lesotho (ADORE study). In: 17th European AIDS Conference; 2019.
55. Indravudh PP, Fielding K, Kumwenda MK, et al. Effect of community-led delivery of HIV self-testing on HIV testing and antiretroviral therapy initiation in Malawi: A cluster-randomised trial. *PLoS Med*. 2021;18(5):e1003608.
56. Pettifor A, Lippman SA, Kimaru L, et al. HIV self-testing among young women in rural South Africa: A randomized controlled trial comparing clinic-based HIV testing to the choice of either clinic testing or HIV self-testing with secondary distribution to peers and partners. *EClinicalMedicine*. 2020;21.
57. Gichangi A, Wambua J, Mutwiwa S, et al. Impact of HIV self-test distribution to male partners of ANC clients: results of a randomized controlled trial in Kenya. *J Acquir Immune Defic Syndr* 1999. 2018;79(4):467.
58. Dovel K, Balakasi K, Phiri K, et al. Effect of index HIV self-testing for sexual partners of clients enrolled in antiretroviral therapy (ART) programs in Malawi: A randomized controlled trial. *PLoS Med*. 2023;20(8):e1004270.
59. Parker LA, Jobanputra K, Rusike L, et al. Feasibility and effectiveness of two community-based HIV testing models in rural Swaziland. *Trop Med Int Health*. 2015;20(7):893-902.
60. Coates TJ, Kulich M, Celentano DD, et al. Effect of community-based voluntary counselling and testing on HIV incidence and social and behavioural outcomes (NIMH Project Accept; HPTN 043): a cluster-randomised trial. *Lancet Glob Health*. 2014;2(5):e267-e277.
61. Cham HJ, MacKellar D, Maruyama H, et al. Methods, outcomes, and costs of a 2.5 year comprehensive facility-and community-based HIV testing intervention in Bukoba Municipal Council, Tanzania, 2014-2017. *PLoS One*. 2019;14(5):e0215654.

62. Labhardt ND, Ringera I, Lejone TI, et al. Effect of offering same-day ART vs usual health facility referral during home-based HIV testing on linkage to care and viral suppression among adults with HIV in Lesotho: the CASCADE randomized clinical trial. *Jama*. 2018;319(11):1103-1112.
63. Geoffroy E, Khozomba N, Jere J, et al. Cracking the code to increase men's uptake of HIV testing: providing convenient and confidential outreach HIV testing services through mobile clinics. In: Vol 21. International AIDS Society Conference; 2018:47-48.
64. Makangila G, Mwango A, Shah M, et al. Faith-engaged community posts associated with over 1200% increase in new HIV case ascertainment, with high linkage and retention, Zambia. In: Vol 23. International AIDS Society Conference; 2020:153-154.
65. Martelli G, Van Duffel L, Salehe IA, et al. Outreach-based HIV testing approach from Test & Treat project in Tanzania: Mid-term results. In: Vol 23. International AIDS Society Conference; 2020:34-34.
66. Nglazi MD, van Schaik N, Kranzer K, Lawn SD, Wood R, Bekker LG. An incentivized HIV counseling and testing program targeting hard-to-reach unemployed men in Cape Town, South Africa. *J Acquir Immune Defic Syndr 1999*. 2012;59(3):e28.
67. Meehan SA, Naidoo P, Claassens MM, Lombard C, Beyers N. Characteristics of clients who access mobile compared to clinic HIV counselling and testing services: a matched study from Cape Town, South Africa. *BMC Health Serv Res*. 2014;14:1-8.
68. Ezeanolue EE, Obiefune MC, Yang W, et al. What do you need to get male partners of pregnant women tested for HIV in resource limited settings? The baby shower cluster randomized trial. *AIDS Behav*. 2017;21:587-596.
69. Alwano MG, Bachanas P, Block L, et al. Increasing knowledge of HIV status in a country with high HIV testing coverage: Results from the Botswana Combination Prevention Project. *PloS One*. 2019;14(11):e0225076.
70. Knoblauch AM, Divall MJ, Owuor M, et al. Experience and lessons from health impact assessment guiding prevention and control of HIV/AIDS in a copper mine project, northwestern Zambia. *Infect Dis Poverty*. 2017;6(04):22-32.
71. Lippman SA, Pettifor A, Dufour MSK, et al. A community mobilisation intervention to improve engagement in HIV testing, linkage to care, and retention in care in South Africa: a cluster-randomised controlled trial. *Lancet HIV*. 2022;9(9):e617-e626.
72. Fylkesnes K, Sandøy IF, Jürgensen M, Chipimo PJ, Mwangala S, Michelo C. Strong effects of home-based voluntary HIV counselling and testing on acceptance and equity: a cluster randomised trial in Zambia. *Soc Sci Med*. 2013;86:9-16.

73. Krakowiak D, Kinuthia J, Osoti AO, et al. Home-based HIV testing among pregnant couples increases partner testing and identification of serodiscordant partnerships. *J Acquir Immune Defic Syndr 1999*. 2016;72(Suppl 2):S167.
74. Roland M, Block L, Bachanas P, et al. Home-based testing identifies more previously undiagnosed older men than mobile testing in Botswana. In: Vol 21. International AIDS Society Conference; 2018:48-49.
75. Phiri MM, Shanaube K, Floyd S, et al. Does a male chip increase uptake of HIV testing by men? Lessons from HPTN 071 study. In: 23rd Conference on Retroviruses and Opportunistic Infections (CROI); 2016.
76. Strasser S, Bitarakwate E, Gill M, et al. Introduction of rapid syphilis testing within prevention of mother-to-child transmission of HIV programs in Uganda and Zambia: a field acceptability and feasibility study. *JAIDS J Acquir Immune Defic Syndr*. 2012;61(3):e40-e46.
77. Derksen L, Muula A, van Oosterhout J. Love in the time of HIV: How beliefs about externalities impact health behavior. *J Dev Econ*. 2022;159:102993.
78. Rosenberg NE, Mtande TK, Saidi F, et al. Recruiting male partners for couple HIV testing and counselling in Malawi's option B+ programme: an unblinded randomised controlled trial. *Lancet HIV*. 2015;2(11):e483-e491.
79. Wirtz A, Mallalieu E, Chidassica J, Pinho D, Devos P, Van Lith L. The Sawa Sawa Intervention: A quasi-experimental trial to reduce community level stigma and improve HIV testing service uptake among men in Sofala Province, Mozambique. In: Vol 22. International AIDS Society Conference; 2019:18-19.
80. Odhiambo F, Dande C, Onyango R, et al. Closing the HIV identification gap for men: The impact of assisted partner notification services in a real-world setting in Kenya. In: International AIDS Society Conference; 2020.
81. Dancy BL, Jere DL, Kachingwe SI, Kaponda CP, Norr JL, Norr KF. HIV risk reduction intervention for rural adolescents in Malawi. *J HIV/AIDS Soc Serv*. 2014;13(3):271-291.
82. Brown LB, Miller WC, Kamanga G, et al. HIV partner notification is effective and feasible in sub-Saharan Africa: opportunities for HIV treatment and prevention. *J Acquir Immune Defic Syndr 1999*. 2011;56(5):437.
83. Masyuko S, Cherutich P, Goyette M, Maingi P, Wamuti B. Variation in Effectiveness of HIV Assisted Partner Services by Region, Rural Location and Gender in Kenya: A Cluster Randomized Trial. In: AIDS Research and Human Retroviruses; 2016.
84. Nigatu YT, Abera S, Mekonnen MG, Melesse WN. The role of the community conversation approach in facilitating HIV/AIDS competence and utilisation of testing services in Africa: the case of Ethiopia. *Afr J AIDS Res*. 2015;14(4):295-301.



85. Kalichman S, Banas E, Kalichman M, et al. Brief enhanced partner notification and risk reduction counseling to prevent sexually transmitted infections, Cape Town, South Africa. *Sex Transm Dis*. 2021;48(3):174.
86. Speizer IS, Zule WA, Carney T, Browne FA, Ndirangu J, Wechsberg WM. Changing sex risk behaviors, gender norms, and relationship dynamics among couples in Cape Town, South Africa: Efficacy of an intervention on the dyad. *Soc Sci Med*. 2018;209:95-103.
87. Audet CM, Blevins M, Chire YM, et al. Engagement of men in antenatal care services: increased HIV testing and treatment uptake in a community participatory action program in Mozambique. *AIDS Behav*. 2016;20(9):2090-2100.
88. Steward WT, Agnew E, de Kadt J, et al. Impact of SMS and peer navigation on retention in HIV care among adults in South Africa: results of a three-arm cluster randomized controlled trial. *J Int AIDS Soc*. 2021;24(8):e25774.
89. McGovern ME, Canning D, Tanser F, Herbst K, Gareta D, Mutevedzi T. A household food voucher increases consent to home-based HIV testing in rural KwaZulu-Natal. In: Vol 2014. 20th Conference on Retroviruses and Opportunistic Infections (CROI); 2014.
90. Chamie G, Schaffer E, Ndyabakira A, Emperador D, Kwarisiima D, Kanya MR. A randomized trial of novel strategies to incentivize HIV testing among men in Uganda. In: 24th Conference on Retroviruses and Opportunistic Infections (CROI); 2017.
91. Tanser FC, Kim H, Mathenjwa T, et al. Home-Based Intervention to Test and Start (HITS): a community-randomized controlled trial to increase HIV testing uptake among men in rural South Africa. *J Int AIDS Soc*. 2021;24(2):e25665.
92. Maman S, Mulawa MI, Balvanz P, et al. Results from a cluster-randomized trial to evaluate a microfinance and peer health leadership intervention to prevent HIV and intimate partner violence among social networks of Tanzanian men. *PLoS One*. 2020;15(3):e0230371.
93. Barnabas RV, van Heerden A, McConnell M, et al. Lottery incentives have short-term impact on ART initiation among men: results from a randomized pilot study. *J Int AIDS Soc*. 2020;23:e25519.
94. Kimaru L, Pettifor A, Lippman S, et al. HIV Self-test Distribution by Young Women: An Innovative Way to Reach Men in Rural South Africa. In: Vol 34. AIDS Research and Human Retroviruses Conference; 2018:138-138.
95. Fahey CA, Njau PF, Katabaro E, et al. Financial incentives to promote retention in care and viral suppression in adults with HIV initiating antiretroviral therapy in Tanzania: a three-arm randomised controlled trial. *Lancet HIV*. 2020;7(11):e762-e771.

96. Cattamanchi A, Crowder R, Kityamuwesi A, et al. Digital adherence technology for tuberculosis treatment supervision: A stepped-wedge cluster-randomized trial in Uganda. *PLoS Med*. 2021;18(5):e1003628.
97. Van Heerden A, Msweli S, Van Rooyen H. “Men don’t want things to be seen or known about them”: A mixed-methods study to locate men in a home based counselling and testing programme in KwaZulu-Natal, South Africa. *Afr J AIDS Res*. 2015;14(4):353-359.
98. Habel MA, Brookmeyer KA, Oliver-Veronesi R, Haffner MM. Creating innovative sexually transmitted infection testing options for university students: the impact of an STI self-testing program. *Sex Transm Dis*. 2018;45(4):272.
99. WHO recommends optimizing HIV testing services. Accessed October 25, 2023. <https://www.who.int/news/item/22-07-2023-who-recommends-optimizing-hiv-testing-services>
100. Bruns C. Using human-centered design to develop a program to engage South African men living with HIV in care and treatment. *Glob Health Sci Pract*. 2021;9(Supplement 2):S234-S243.
101. Hubbard J, Mphande M, Robson I. Core components of male-specific person-centered care: Client and healthcare worker perspectives in Malawi. In: AIDS Impact Conference; 2023.
102. Barnabas RV, Szpiro AA, van Rooyen H, et al. Community-based antiretroviral therapy versus standard clinic-based services for HIV in South Africa and Uganda (DO ART): a randomised trial. *Lancet Glob Health*. 2020;8(10):e1305-e1315.
103. Camara BS, Belaid L, Manet H, et al. What do we know about patient-provider interactions in sub-Saharan Africa? a scoping review. *Pan Afr Med J*. 2020;37(1).
104. Hubbard J, Mphande M, Robson I. Core components of male-specific person-centered care: client and healthcare worker perspectives in Malawi. Published online October 2023.
105. Malone S, Hlongwa M, Little K, Hasen N, Levy M, Clutton L. Coach Mpilo: a peer-support intervention to improve men’s ART linkage & retention. In: Vol 29(1). 2021 Conference on Retroviruses and Opportunistic Infections; 2021:296.
106. Dovel K, Balakasi K, Hubbard J. Improving re-engagement in treatment for men with HIV in Malawi: comparison of two trials Paper accepted for poster presentation. In: Conference on Retroviruses and Opportunistic Infections (CROI); 2023.
107. Dovel K, Paneno R, Balakasi K, et al. Health care workers’ internal bias toward men as HIV clients in Malawi and Mozambique: A qualitative study. *medRxiv*. Published online 2022:2022-11.

108. Mbokazi N, Madzima R, Leon N, et al. Health worker experiences of and perspectives on engaging men in HIV care: A qualitative study in Cape Town, South Africa. *J Int Assoc Provid AIDS Care JIAPAC*. 2020;19:2325958220935691.
109. Beia T, Kielmann K, Diaconu K. Changing men or changing health systems? A scoping review of interventions, services and programmes targeting men's health in sub-Saharan Africa. *Int J Equity Health*. 2021;20(1):1-16.
